# Supplementary material for: Modular, robust, and extendible multicellular circuit design in yeast
Source: eLife. 2022 Mar 21;11:e74540. doi: 10.7554/eLife.74540 (PMC9000959; doi:10.7554/eLife.74540)
Supplement: Figure 1—source data 1. [file elife-74540-fig1-data1.xlsx]

## Sheet: Figure 1
	Sensors
	Figure 1 b												Figure 1 c
	IAA repressing GFP												alpha-factor repressing GFP										beta-estradiole repressing GFP										IAA activating GFP												alpha-factor activating GFP
		IAA (nM)												alpha (nM)										beta (nM)										IAA (nM)												alpha(nM)
	Time	0	1	5	10	50	100	500	1000	5000	10000		Time (hrs)	0	1	5	10	50	100	500	1000		Time	0	0.1	0.5	1	5	10	50	100		Time	0	1	5	10	50	100	500	1000	5000	10000		Time (hrs)	0	1	5	10
	0	43.904	43.0145	41.7919	42.277	43.307	43.7659	43.5218	42.9856	41.6887	40.4636		0	10.0641	9.77734	10.9324	9.70256	9.99282	10.2514	9.69542	9.89758		0	18.1679	17.9875	18.0257	18.237	18.5217	18.1612	17.072	17.4059		0	10.7548	11.5818	9.41991	11.8802	10.4258	11.3067	10.3319	10.8887	10.4829	8.94075		0	4.57813	3.45146	3.49971	3.51363
	3	44.546			45.1363	44.4582	42.0748	36.9578	30.2264	21.3958	19.7898		3	8.96245	8.12554	7.22712	6.53134	5.18232	5.20039	4.92026	4.9176		3	18.4565	18.0319	17.7415	17.5102	13.8624	11.1478	8.15651	7.91709		3	12.2905	11.8126	12.6127	11.949	12.5002	13.5795	16.4639	18.453	22.4448	23.4402		1	5.0405	3.60632	3.91922	4.55735
	5	44.4857	44.0007	44.6041	43.9542	43.1666	41.9996	34.3044	29.2437	18.3988	16.815		5	8.82517	8.08796	6.73641	5.73263	4.55256	3.85489	3.55294	3.65825		5	18.4425	18.0035	17.2922	14.7757	7.38908	5.26746	3.62125	3.46319		5	10.8922	11.6504	11.2825	11.7967	12.6978	13.2555	17.7337	20.3781	24.6127	27.6853		2	3.72193	4.19008	4.62179	6.61008
	8	43.9031	43.5607	44.9718	43.8099	41.9785	40.7629	32.1886	26.7062	15.1905	13.8843		8	9.41643	8.91255	6.59723	5.83321	4.1045	3.84441	3.17286	3.02284		8	18.5681	18.4361	15.6544	10.2365	3.13963	2.29261	1.70589	1.65932		8	9.64942	9.80556	9.99461	10.2	11.2572	12.4944	18.0876	21.4678	27.2385	30.7996		3	4.12076	4.45789	4.63899	7.34445
																																													4	3.76311	4.45976	4.78169	6.89913
		IAA (nM)												alpha (nM)										beta (nM)										IAA(nM)											5	3.71262	4.23342	4.5914	6.71297
	Time	0	1	5	10	50	100	500	1000	5000	10000		Time (hrs)	0	1	5	10	50	100	500	1000		Time	0	0.1	0.5	1	5	10	50	100		Time	0	1	5	10	50	100	500	1000	5000	10000		6	3.44855	4.11339	4.44677	6.66587
	0	44.1975	44.8337	44.6171	44.7984	44.219	45.0999	46.8253	45.4513	44.8122	45.2919		0	9.98199	9.61261	9.74303	10.2761	10.5511	9.58343	10.2286	10.1485		0	11.2821	12.2994	12.3662	13.1746	12.574	12.7387	14.5008	16.2146		0	9.58869	8.22586	8.69723	8.49871	8.48866	8.51674	8.20525	8.50258	8.44904	8.19977		7	3.47889	4.07173	4.45111	6.3772
	3	38.8375	38.1662	38.917	39.1409	38.677	37.241	33.2926	30.0836	23.5711	20.9082		3	8.85007	8.55372	7.07164	6.47368	5.42445	5.00121	4.8985	5.14983		3	12.621	12.1751	12.4307	11.3619	8.60502	7.49668	8.03782	7.44253		3	10.9864	10.0008	10.0182	10.4958	10.7031	11.4349	14.667	17.5991	20.8197	21.7152		8	3.59816	4.12313	4.39504	6.30285
	5	41.4507	40.2542	41.5131	40.9399	39.6535	39.239	32.2489	27.8899	19.7888	16.3146		5	8.89531	8.24472	6.87181	6.05708	4.58221	3.90132	3.64038	3.76538		5	12.5817	12.2571	10.5612	8.28792	4.3005	3.67062	3.97104	3.78575		5	9.98712	9.4385				11.2733	15.9122	19.6496	24.4059	27.1136		10	3.31011	3.97684	4.30205	6.2409
	8	44.6279	43.6744	43.8886	43.4337	42.1856	40.8445	33.2101	27.6048	17.2402	13.8516		8	9.28724	8.79476	6.76573	5.95628	4.45978	3.94115	3.27275	3.02956		8	12.1243	11.7568	9.27706	5.41231	2.2802	1.98587	1.69687	1.65936		8	8.97452	8.39001	8.50209	8.67663	10.0916	11.4779	17.5349	21.8128	26.4227	27.256
																																														alpha(nM)
		IAA (nM)												alpha (nM)										beta (nM)										IAA (nM)											Time (hrs)	0	1	5	10
	Time	0	1	5	10	50	100	500	1000	5000	10000		Time (hrs)	0	1	5	10	50	100	500	1000		Time	0	0.1	0.5	1	5	10	50	100		Time	0	1	5	10	50	100	500	1000	5000	10000		0	3.32143	3.36454	3.3559	3.24829
	0	44.3182	45.0261	45.4839	46.1545	45.9547	44.8199	43.6133	45.1316	44.3988	44.1776		0	10.3722	10.2167	10.3725	10.1634	9.60769	10.019	9.29837	10.2968		0	12.5318	12.1596	12.3764	12.6596	12.0658	12.2994	15.0002	15.5043		0	7.84374	7.35079	7.48342	6.96268	7.49244	7.28528	7.35027	7.08421	7.52917	7.07942		1	3.66317	3.81279	3.98461	4.65222
	3	39.5286	39.1902	39.2967	39.7786	38.7428	38.5876	33.0721	30.1777	22.7109	21.6493		3	8.91679	8.34543	7.30962	6.11743	5.28241	4.90251	4.65122	4.76554		3	12.6901	12.3193	11.9744	11.2096	8.28958	7.17361	7.89544	7.4608		3	9.09736	8.55716	7.85506	7.66406	7.86012	9.46357	13.7961	16.7612	18.7398	20.2118		2	3.60899	4.10201	4.59329	6.11488
	5	40.9655	41.4119	40.1155	40.7366	39.3997	39.1353	33.3827	28.2414	18.2738	16.6625		5	9.08449	8.26541	7.00738	5.7535	4.37215	3.9385	3.41247	3.60719		5	12.7509	12.6087	11.1372	8.2481	4.19565	3.56932	3.9028	3.71411		5	8.0833	7.9558	7.51235	7.3817	8.40196	10.3274	15.2415	19.4777	23.5278	24.0047		3	3.96736	4.22584	4.71072	6.5022
	8	43.6295	44.301	43.9746	42.5296	42.5248	40.9023	33.7744	27.8845	17.226	14.6197		8	9.27351	8.70297	7.14254	5.94632	4.45078	3.92901	3.23085	2.9873		8	11.7225	11.6819	9.03145	5.21337	2.27521	2.00343	1.71282	1.67287		8	7.51583	7.78963	8.66087	8.90283	10.078	11.1304	17.9407	21.2667	25.8567	25.9428		4	3.58979	4.22413	4.59404	6.42013
																																													5	3.48709	4.04148	4.47403	6.4774
																																													6	3.53934	3.90106	4.25819	6.17584
																																													7	3.4091	3.84901	4.30539	6.05067
																																													8	3.3446	3.79896	4.26923	5.85418
	Figure 1 d																																												10	3.27662	3.7617	4.14414	5.78188
	IAA activating GFP, alpha-factor repressing it												alpha-factor activating GFP, IAA repressing it																																	alpha(nM)
																																													Time (hrs)	0	1	5	10
		Rep1												Rep1																															0	3.44619	3.50378	3.29955	3.38391
	Time (hrs)	control	alpha200nM	IAA500nM	IAA500nM+alpha200nM	IAA5000nM	IAA5000nM+alpha200nM	alpha10nM	alpha10nM+IAA500nM				Time (hrs)	control	alpha50nM	IAA500nM	IAA500nM+alpha50nM	IAA500nM+alpha200nM	IAA5000nM	IAA5000nM+alpha50nM	alpha1uM																								1	3.71838	3.4894	3.70049	4.63023
	0	31.4189	31.7998	35.3674	35.1143	33.3169	31.4635	31.247	35.4159				0		16.0244	17.2647	18.2761	16.4758	16.6733	15.8798	17.3667																								2	3.59722	4.07386	4.35091	6.69368
	3	36.0238	23.6979	39.6135	30.05	47.3616	38.7572	23.3357	26.3363				3	16.1866	21.4657	15.1091	20.6307	21.4779	14.9114	16.0106	21.4414																								3	3.78031	4.37939	4.7961	6.51587
	5	32.6519	14.5947	43.4005	27.2149	53.8211	37.5385	16.1436	23.6943				5	15.4265	20.8055	15.2645	18.5901	21.3172	13.783	13.571	23.1076																								4	3.6584	4.20434	4.76925	6.58811
	8	31.1392	9.45971	44.8771	20.8489	59.1925	39.0158	16.5713	25.2268				8	15.7784	20.8263	14.9122	20.4422	22.5772	13.2138	13.1815	25.9973																								5	3.60678	4.05083	4.49499	6.72033
	10	30.1688	8.3635	43.4651	20.8933	59.6615	37.7752	16.0678	25.6727				10	16.6427	21.1046	15.2821	19.3434	20.426	13.4294	12.6297	25.2896																								6	3.46946	3.92798	4.55505	6.25738
																																													7	3.36013	3.89818	4.57586	6.14309
		Rep2												Rep2																															8	3.36999	3.79511	4.51686	6.02117
	Time (hrs)	control	alpha200nM	IAA500nM	IAA500nM+alpha200nM	IAA5000nM	IAA5000nM+alpha200nM	alpha10nM	alpha10nM+IAA500nM				Time (hrs)	control	alpha50nM	IAA500nM	IAA500nM+alpha50nM	IAA500nM+alpha200nM	IAA5000nM	IAA5000nM+alpha50nM	alpha1uM																								10	3.23825	3.72576	4.39168	5.98259
	0	33.3646	32.8495	31.0158	34.0207	34.1237	32.4343	30.2488	30.6199				0	17.8789	15.7707	16.1589	16.4196	15.4162	16.2034	16.9728	16.7289
	3	36.0179	22.351	39.4674	27.0666	48.4287	40.4818	25.5173	25.1769				3	20.8477	17.8239	16.3331	20.6264	23.3987	15.4014	15.9742	23.2687
	5	33.7874	15.1586	41.7979	21.1383	53.6046	40.2434	16.5881	23.9799				5	20.3585	21.1424	16.2112	19.5601	22.2322	13.1527	14.4136	25.6335
	8	31.117	9.7786	42.1018	19.3171	59.1166	37.9634	18.6715	23.9063				8	20.0624	19.5691	15.049	18.8137	21.0829	13.5155	13.7253	26.0075
	10	31.7719	8.14674	41.8675	18.9105	60.2017	37.9335	17.5608	26.6853				10	18.9672	21.433	15.1431	19.1794	19.254	13.2163	13.0647	25.9697
		Rep3												Rep3
	Time (hrs)	control	alpha200nM	IAA500nM	IAA500nM+alpha200nM	IAA5000nM	IAA5000nM+alpha200nM	alpha10nM	alpha10nM+IAA500nM				Time (hrs)	control	alpha50nM	IAA500nM	IAA500nM+alpha50nM	IAA500nM+alpha200nM	IAA5000nM	IAA5000nM+alpha50nM	alpha1uM
	0	33.1049	31.8754	35.178	32.0448	35.7433	33.7479	28.5842	27.2766				0	14.6828	15.9388	15.2498	16.9061	16.3867	16.2953	14.8879	14.9949
	3	35.3227	21.3486	40.6841	29.0755	48.5571	37.1921	29.7222	28.7867				3	16.9357	19.241	14.513	21.3177	22.7655	13.9468	15.0137	22.9653
	5	33.0457	14.2091	40.4055	25.21	55.1423	38.933	16.8514	24.0301				5	16.3178	21.1759	14.3331	21.1086	23.4079	13.1312	12.8484	25.2893
	8	31.2308	9.93321	42.1277	21.8962	59.5523	37.5322	16.6333	25.7027				8	16.6869	21.6627	15.2004	19.3811	22.3265	11.7485	14.001	25.6347
	10	31.0042	8.5629	43.0686	20.0657	58.6553	35.4892	17.7944	28.052				10	16.8461	22.6164	15.4261	19.092	21.3273	14.1679	13.5449	26.86
[truncated: 15 more columns]

## Sheet: supplement 1
				Average			STDEV
				Control	IAM300uM		Control	IAM300uM
			Sensor	1	1.04674		0	0.179333
			Sensor + Sender (iaaH)	0.929095	0.73177		0.0788361	0.0897046
			Sensor + Sender (iaaH+PGP1)	0.846205	0.475236		0.135396	0.0879951
														YFP-IAA17			iaaH + YFP-IAA17			PGP1+iaaH + YFP-IAA17
														Control	IAM300uM		Control	IAM300uM		Control	IAM300uM
													Repeat 1	1	1.01236		0.945972	0.78917		0.981974	0.541388
													Repeat 2	1	0.887078		0.843187	0.628398		0.711186	0.375368
													Repeat 3	1	1.24077		0.998126	0.777741		0.845455	0.508951
													Average	1	1.04674		0.929095	0.73177		0.846205	0.475236
													STDEV	0	0.179333		0.0788361	0.0897046		0.135396	0.0879951

## Sheet: supplement 2
				Control	IAA	IAA-Asp						Peak Area	IAA-Asp	IAA	IAA-Asp/IAA
			Steady State value	47.5469	15.274	46.1719						WT	1310.8	286093	0.00458173
			Normalized value	1	0.321242	0.971082						GH3.3	10936680	1.21621e+06	8.99242
			ST DEV	0.00768961	0.00424867	0.00832064						GH3.6	8.00387e+06	1.02396e+06	7.81655
				control	IAA10uM	IAAAsp10uM
			Rep1	46.3385	14.4728	45.4771
			Rep2	46.969	14.0689	45.3136
			Rep3	46.3331	14.2804	44.7249

## Sheet: supplement 6
															Steady State (10 hours)									alpha-|alpha		Steady State (10 hours)
		beta-|GH3							alpha-|GH3						alpha->BAR1
	Treatment	IAA sensor (repressing GFP)		β-|GH3+sensor				Treatment	IAA sensor (repressing GFP)		alpha-|GH3+sensor			alpha-factor (nM)	alpha sensor (repressing GFP)		alpha->BAR1 + sensor						alpha-factor (nM)	alpha sensor (repressing GFP)		alpha-|alpha + sensor
	control	44.0535	0.421255					control	44.0535	0.421255				1	9.3319	0.137401	9.72287	0.0370095					0.1	9.3319	0.0589124	7.62843	0.585296
	IAA1000nM	27.3985	0.502695	34.2605	1.24111			IAA1000nM	27.3985	0.502695	34.3464	1.20412		5	6.84448	0.167513	7.57116	0.132474					1	8.79391	0.137401	7.62633	0.428177
	IAA1000nM + β100nM			34.0135	0.835908			IAA1000nM + α 500nM			32.6445	1.38958		50	4.29609	0.104694	4.45975	0.170775					5	6.84448	0.167513	6.18467	0.284641
		Average	StDEV	Average	StDEV				Average	StDEV	Average	StDEV		200			3.70224	0.0320211					10	5.69213	0.0649083	5.61545	0.335749
														500	3.19295	0.0224799	3.32479	0.0131378					50	4.29609	0.104694	3.8655	0.0594695
														1000	2.97604	0.0141045	3.11051	0.0743434					100	3.88174	0.0428787	3.50077	0.0556993
															Average	StDEV	Average	StDEV					500	3.19295	0.0224799	2.79607	0.060216
																							1000	2.97604	0.0141045	2.6346	0.113746
																								Average	StDEV	Average	StDEV
																								IAA-|IAA		Steady State (10 hours)
		beta-|BAR1							IAA-|BAR1						IAA->GH3	Steady State (10 hours)
	Treatment	alpha sensor (repressing GFP)		beta-|BAR1+sensor				Treatment	alpha sensor (repressing GFP)		beta-|BAR1+sensor			IAA (nM)	IAA sensor (repressing GFP)		IAA->GH3 + sensor						IAA (nM)	IAA sensor (repressing GFP)		IAA-|IAA + sensor
	control	9.32573	0.0788474					control	9.32573	0.0788474				10	44.6279	0.421255	44.3567	0.347266					1	44.6279	0.421255	17.8115	0.254318
	α 500nM	3.22549	0.0501615	3.35899	0.0199864			α 100nM	3.90486	0.0527008	4.44601	0.0932376		500	33.2101	0.656292	34.147	0.973256					10	43.4337	0.537289	17.9716	0.182856
	α 500nM + β 100nM			3.32871	0.0575456			α 100nM + IAA 5μM			4.36057	0.0573548		1000	27.6048	0.502695	26.314	1.46752					50	42.1856	0.225207	17.7657	0.000479603
		Average	StDEV	Average	StDEV				Average	StDEV	Average	StDEV		5000	17.2402	0.962897	17.5855	0.98542					100	40.8445	0.0572165	17.6813	0.000596496
															Average	StDEV	Average	StDEV					500	33.2101	0.656292	17.5819	0.145089
																							1000	27.6048	0.502695	16.7342	0.240415
																							5000	17.2402	0.962897	14.886	0.558894
																								Average	StDEV	Average	StDEV

## Sheet: supplement 7
		IAA-|2xGFP
		Rep1	Rep2	Rep3			Average	STDEV	VarCoeff		Percentage difference	T-test
	control	86.6388	91.0153	90.0087		control	89.2209	2.2921	2.56901
	1μM α-factor	81.8862	83.7391	83.5905		1μM α-factor	83.0719	1.02956	1.23936		6.89188	0.0142057
	100nM β-estr	88.9248	88.948	84.3422		100nM β-estr	87.405	2.65249	3.03471		2.03531	0.512394
	10μM IAA	28.0391	27.6001	25.7336		10μM IAA	27.1243	1.22417	4.51318
	IAA10μM+1μM α-factor	33.9076	33.0903	34.2672		10μM IAA+1μM α-factor	33.755	0.603101	1.7867		24.4458	0.0202284
	IAA10μM+100nM β-estr	28.1752	28.2831	28.2304		10μM IAA+100nM β-estr	28.2295	0.0539443	0.191092		4.07482	0.261436
		alpha-|GFP
		Rep1	Rep2	Rep3
	control	19.68	22.2417	19.9676		control	20.6298	1.40337	6.80265
	IAA10uM	17.8735	21.1116	21.0603		10μM IAA	20.0151	1.85485	9.26725		2.97927	0.55545
	beta100nM	21.5661	19.0249	20.4281		100nM β-estr	20.3397	1.27289	6.25813		1.40592	0.866296
	alpha1uM	4.91115	4.92467	4.86667		1μM α-factor	4.90083	0.0303463	0.619207
	alpha1uM+IAA10uM	5.05287	5.07636	5.08117		1μM α-factor+10μM IAA	5.07013	0.0151452	0.298713		3.45453	0.0176309
	alpha1uM+beta100nM	5.11901	5.1471	4.95661		1μM α-factor+100nM β-estr	5.07424	0.102833	2.02658		3.53835	0.0538293
		beta-|GFP
		Rep1	Rep2	Rep3
	control	25.3137	24.2588	24.1639		control	24.5788	0.638223	2.59664
	IAA10uM	24.8836	29.2119	24.3053		10μM IAA	26.1336	2.68156	10.261		6.32577	0.458562
	alpha1uM	26.7738	27.3609	27.3729		1μM α-factor	27.1692	0.342507	1.26064		10.5391	0.0445769
	beta100nM	2.90199	3.19312	2.87972		100nM β-estr	2.99161	0.174867	5.84525
	beta100nM+IAA10uM	3.28874	3.35925	3.28128		100nM β-estr+10μM IAA	3.30975	0.0430254	1.29996		10.6345	0.0527674
	alpha1uM+beta100nM	3.16073	3.13015	3.08376		100nM β-estr+1μM α-factor	3.12488	0.0387542	1.24018		4.45475	0.311938
		IAA-|2xGFP
		Rep1	Rep2	Rep3			Average	STDEV	VarCoeff		Percentage difference
	control	43.9031	44.6279	43.6295		control	44.0535	0.51593	1.17114
	1μM α-factor	42.5809	43.8023	42.8687		1μM α-factor	43.084	0.638531	1.48206		2.20084	0.0318621
	5μM IAA	15.1905	17.2402	17.226		5μM IAA	16.5522	1.1793	7.12475
	5μM IAA+1μM α-factor	17.0969	15.1029	15.6601		5μM IAA+1μM α-factor	15.9533	1.02886	6.44922		3.6183	0.682199
						IAA-|2xGFP
							Average	STD			Percentage difference
					no IAA	control	44.0535	0.51593
						control	43.084	0.638531			2.20084
					100nM IAA	100nM IAA	40.8366	0.0700756
						100nM IAA	39.8113				2.51057
					500nM IAA	500nM IAA	33.0577	0.80379
						500nM IAA	33.464				1.22906
					1μM IAA	1μM IAA	27.3985	0.615674
						1μM IAA	26.8202				2.11063
					5μM IAA	5μM IAA	16.5522	1.1793
						5μM IAA	15.9533	1.02886			3.6183
