# Supplementary material for: Modular, robust, and extendible multicellular circuit design in yeast
Source: eLife. 2022 Mar 21;11:e74540. doi: 10.7554/eLife.74540 (PMC9000959; doi:10.7554/eLife.74540)
Supplement: Figure 2—source data 1. [file elife-74540-fig2-data1.xlsx]

## Sheet: Figure 2
	Figure 2 a											Figure 2 b										Figure 2 c
																							beta->BAR1 + alpha->GFP
		alpha->IAA + IAA-|2xGFP											alpha->IAA(5x) + IAA-|2xGFP		alpha->IAA(10x) + IAA-|2xGFP							Steady State (10 hours)
	Steady State (10 hours)										Steady State (10 hours)												alpha-factor
		alpha-factor (nM)	Average	STDEV	VarCoeff		Time (hrs)	alpha 100nM	STDEV			alpha-factor (nM)	Average	StDev	Average	StDev						beta-estr (nM)	control	alpha200nM	alpha1uM
		0	41.2219	0.0836336	0.202887		0	40.0276	0.79351			0	39.9304	0.71146	36.4444	0.200894						0	1.87104	10.6082	14.082
		5	37.6456	0.14462	0.384161		3	43.2669	0.172543			10	28.1451	1.35557	22.7903	0.685338						1	1.70895	9.82174	12.3406
		10	33.9389	0.48873	1.44003		5	38.2266	0.251466			50	19.9625	0.282572	17.8029	0.979846						10	1.71314	6.43572	9.91712
		50	30.8518	1.92714	6.24646		8	30.1966	2.20147			100	18.7612	0.701514	15.4941	1.0778						100	1.66122	6.22435	8.76071
		100	22.5701	1.78757	7.92009		10	22.5701	1.78757
		200	22.6022	0.841186	3.72169
		500	22.5587	0.208184	0.922851
		1000	24.175	1.22207	5.0551
	Figure 2 d											Figure 2 e										Figure 2 f
		IAA->alpha + alpha-|GFP											beta-|alpha + alpha-|GFP										beta->alpha->IAA-|GFP
	Steady State (10 hours)											Steady State (10 hours)										Steady State (12 hours)
		IAA (nM)	Average	STDEV	VarCoeff			Scaled time series					beta-estr (nM)	Average	STDEV	VarCoeff		Time (hrs)	beta1nM	STDEV			beta-estr (nM)	Average	STDEV	VarCoeff
		0	7.51563	0.0767489	1.02119		Time (hrs)	IAA 1uM	STDEV				0	7.67358	0.133003	1.99355		0	10.1394	0.2373			0	41.9386	0.528986	1.26134
		50	7.34152	0.0915955	1.24764		0	9.26396	0.359151				0.1	7.70584	0.0926496	1.10413		3	8.90977	0.134167			1	37.1841	1.64415	4.42165
		100	7.0386	0.146272	2.07815		3	8.22079	0.328464				0.5	7.96747	0.0721758	0.905881		5	9.26078	0.0289123			5	32.3386	2.38417	7.3725
		500	6.57034	0.0574693	0.874679		5	7.94471	0.024459				1	8.75172	0.0485871	2.4316		8	9.00931	0.067255			10	31.2502	2.11667	6.7733
		1000	6.47296	0.0569088	0.879177		8	7.20847	0.0888696				5	9.11778	0.222482	2.2408		10	8.75172	0.0485871
		2500	6.30434	0.108317	1.71814		10	6.47296	0.0569088				10	9.31168	0.101259	0.998618
		5000	6.10536	0.0414871	0.67952								50	9.16216	0.0216953	0.217452
		10000	6.14792	0.080436	1.30835								100	9.38321	0.128574	1.37026
		beta->alpha + alpha-|GFP											IAA-|alpha + alpha-|GFP										beta->IAA->alpha-|GFP
	Steady State (10 hours)											Steady State (10 hours)										Steady State (12 hours)
		beta-estr (nM)	Average	STDEV	VarCoeff		Time (hrs)	beta5nM	STDEV				IAA (nM)	Average	STDEV	VarCoeff		Time (hrs)	IAA 10uM	STDEV			beta(nM)	Average	STDEV	VarCoeff
		0	8.66087	0.0796693	0.970385		0	8.07614	0.181545				0	5.71054	0.0853402	1.49443		0	7.9929	0.359608			0	7.57269	0.112141	1.48086
		0.1	8.34328	0.214844	2.57506		3	8.64927	0.0495586				100	5.74688	0.0998239	1.73701		3	8.11108	0.246666			1	7.08581	0.0582443	0.821986
		5	4.78384	0.0216939	0.453482		5	7.05359	0.148092				500	5.94796	0.173019	2.90888		5	8.11967	0.332797			5	6.51412	0.0828675	1.27212
		10	4.413	0.137177	3.22377		8	5.46639	0.0935233				750	6.16499	0.138067	2.23954		8	7.76733	0.253787			10	6.40369	0.0374247	0.584423
		25	4.40814	0.136772	3.10271		10	4.78384	0.0216939				1000	6.15343	0.209792	3.40935		10	7.27961	0.110151
		50	4.39882	0.0571747	1.29977								2500	6.58915	0.139922	2.12352
		500	4.25838	0.0835083	1.96103								5000	6.87872	0.230248	3.34725
		1000	4.11172	0.0144484	0.351396								10000	7.25998	0.117496	1.6184
		beta->IAA + IAA-|2xGFP											alpha-|IAA + IAA-|2xGFP
	Steady State (10 hours)											Steady State (10 hours)
		beta-estr (nM)	Average	STDEV	VarCoeff		Time (hrs)	beta5nM	STDEV				alpha-factor (nM)	Average	STDEV	VarCoeff		Time (hrs)	alpha50nM	STDEV
		0	43.9724	0.753021	1.71248		0	43.291	0.922734				0	27.5448	0.795939	3.51735		0	44.0398	0.859059
		0.1	44.4655	0.234091	0.526455		3	42.4422	0.466695				5	28.8637	0.88754	3.07493		3	40.826	0.689403
		5	31.813	0.871477	0.455519		5	41.7014	0.949977				10	31.1088	0.799094	3.12673		5	38.2943	0.451661
		10	27.3961	0.0813977	0.297114		8	40.0855	0.332637				50	31.8144	0.343959	1.08114		8	34.2145	0.622339
		25	26.7798	0.620723	2.31788		10	31.813	0.871477				100	32.1179	0.751109	2.84662		10	31.8144	0.384155
		50	26.5043	0.355188	1.34011								200	32.769	0.0860204	0.262505
		100	26.7466	0.394768	1.47596								500	32.6367	1.26464	4.71665
		500	25.8384	0.751673	2.90913								1000	33.0924	0.701077	2.11854
		beta->IAA(10x) + IAA-|2xGFP											beta-|IAA + IAA-|2xGFP
	Steady State (10 hours)											Steady State (10 hours)
		beta-estr (nM)	Average	STDEV									beta-estr (nM)	Average	STDEV	VarCoeff		Time (hrs)	beta1nM	STDEV
		0	43.0879	0.674181									0	37.2408	0.558868	1.50069		0	43.8051	1.23746
		1	29.1538	0.497082									0.1	37.5072	0.148889	0.39696		3	43.2881	0.865509
		5	18.4242	1.44928									0.5	40.6913	0.224057	0.550625		5	42.0615	0.818802
		10	19.2521	0.710021									1	41.3374	0.55309	2.1196		8
													5	41.8625	0.890862	2.12807		10	41.3374	0.55309
													10	42.8601	0.382321	0.892019
													50	43.3064	0.11163	0.257769
		IAA->BAR1 + Alpha->GFP											100	44.4194	1.91453	4.31012
	Steady State (10 hours)
	Average		alpha-factor						IAA500nM+alpha50nM
		IAA (nM)	control	alpha50nM	alpha500nM			Time (hrs)	Average	STDEV
		0	2.53987	4.97741	11.8415			0	3.06739	0.0473282
		500	2.54955	4.54341	9.0165			3	8.214	0.516537
		1000	2.48321	4.36432	8.81525			5	6.73693	0.368975
		5000	2.52565	4.02592	8.01952			8	5.50139	0.093604
								10	4.45072	0.0246299
	STDEV
			alpha-factor
		IAA (nM)	control	alpha50nM	alpha500nM
		0	0.107816	0.297561	0.410041
		500	0.0947586	0.202238	1.82234
		1000	0.0897661	0.153336	0.233413
		5000	0.0839375	0.209609	1.46763
		beta->GH3 + IAA-|2xGFP
	Steady State (10 hours)								IAA500nM+beta10nM
	Average							Time (hrs)	Average	STDEV
			IAA (nM)					0	43.8038	0.760462
		beta(nM)	control	IAA 50nM	IAA 100nM	IAA 500nM		3	37.9841	0.0283111
		0	44.0535	42.2297	40.8366	33.0577		5	36.9247	0.058856
		10	44.0535	43.0285	42.2127	36.4765		8	36.6678	0.0338367
		100	44.0535	43.2083	43.9039	38.8145		10	36.4765	0.217695
	STDEV
			IAA (nM)
		beta(nM)	control	IAA 50nM	IAA 100nM	IAA 500nM
		0	0.516722	0.225207	0.0572165	0.656292
		10	0.00584072	0.437166	0.167774	1.63034
		100	0.224157	0.143987	0.0521882	0.742551
		alpha->GH3 + IAA-|2xGFP
	Steady State (10 hours)								IAA500nM+alpha200nM
	Average							Time (hrs)	Average	STDEV
		alpha-factor (nM)	control	IAA 50nM	IAA 100nM	IAA 500nM		0	44.073	0.137974
		0	44.0535	42.2297	40.8366	33.0577		3	39.4781	0.11335
		50	43.9078	43.9277	40.903	35.376		5	39.5889	0.0964884
		200	43.4408	44.1652	43.8029	40.0789		8	39.6246	0.0618962
		1000	44.2971	45.145	44.7723	42.576		10	39.5357	0.251794
	STDEV
			IAA (nM)
		alpha-factor (nM)	control	IAA 50nM	IAA 100nM	IAA 500nM
		0	1.02326	0.835553	0.648907	0.648907
		50	1.01676	1.18622	1.00661	1.02492
		200	0.394822	0.441249	0.621921	0.220625
		1000	0.667892	0.285407	1.7118	0.142704
