# Supplementary material for: Modular, robust, and extendible multicellular circuit design in yeast
Source: eLife. 2022 Mar 21;11:e74540. doi: 10.7554/eLife.74540 (PMC9000959; doi:10.7554/eLife.74540)
Supplement: Figure 3—source data 1. [file elife-74540-fig3-data1.xlsx]

## Sheet: Figure 3
	Figure 3 a															Figure 3 b
		IAA->IAA + IAA-|2xGFP							alpha->alpha								alpha-|BAR1 + alpha-|GFP							IAA-|GH3 + IAA-|2xGFP
	Steady State (10 hours)							Steady State (10 hours)								Steady State (10 hours)							Steady State (10 hours)
	IAA (nM)	Nominal	Feedback	STDEV	VarCoeff			alpha (nM)	Nominal	Feedback	STDEV	VarCoeff				alpha-factor (nM)	Nominal	Feedback	STDEV	VarCoeff			IAA (nM)	Nominal	Feedback	STDEV	VarCoeff
	0	44.6279	26.0481	0.949607	3.64559			0.1	9.3319	8.49757	0.189701	2.23242				1	9.3319	9.99684	0.171654	1.71708			10	44.6279	43.5153	0.23513	0.540339
	500	33.2101	22.8134	0.954379	4.18341			1	8.79391	8.13789	0.151942	1.86709				5	6.84448	8.41254	0.27809	3.30566			500	33.2101	38.1618	2.97383	7.79269
	1000	27.6048	20.2375	0.160561	0.793384			5	6.84448	6.01219	0.107911	1.79487				50	4.29609	5.26559	0.0410187	0.778994			1000	27.6048	33.3565	7.69481	23.0684
	5000	17.2402	15.3629	0.259144	1.68682			10	5.69213	5.61484	0.241755	4.30565				200		4.13503	0.0495013	1.19712			5000	17.2402	22.8294	4.45658	19.5212
								50	4.29609	2.6094	0.103063	2.8148				500	3.19295	3.69067	0.0493326	1.33668
								100	3.88174	2.59996	0.0307483	0.921597				1000	2.97604	3.45563	0.0929706	2.69041
								500	3.19295	2.4806	0.0218091	0.879187
								1000	2.97604	2.33492	0.0158036	0.676837
	Figure 3 f
			5-strain bistable switch
		Time (hr)	Average	STD
		0	41.5766	0.715253
Auxin added		3	41.32	0.605321
		5	39.4214	0.592024
		7	30.7397	0.36477
		9	19.5402	0.38087
		11	17.3662	0.463282
		13	19.5205	0.157168
alpha-factor added		15	18.4514	0.664797
		17	25.7878	0.651303
		19	29.0394	0.184209
		21	32.2597	0.292653
		23	41.8299	0.914235
		25	41.9114	0.640117
		27	39.6778	0.548082
		29	36.3821	0.494849
		31	33.8355	0.633775

## Sheet: supplement 1
		alpha-|IAA + IAA-|alpha
	Time	Average	STDEV
	0	42.2039	0.914235
	3	40.6614	0.640117
	5	39.3604	0.548082
	7	30.7186	0.494849
	9	20.6022	0.633775
	11	19.627	0.651303
	13	23.7063	0.184209
	15	28.1779	0.292653

## Sheet: supplement 3
OD600
		IAA-|2xGFP			alpha-|IAA			IAA-|alpha			alpha->GH3			IAA->BAR1
	Time	Rep1	Rep2	Rep3	Rep1	Rep2	Rep3	Rep1	Rep2	Rep3	Rep1	Rep2	Rep3	Rep1	Rep2	Rep3
	00:00:00	0.093	0.086	0.084	0.085	0.083	0.084	0.087	0.087	0.087	0.088	0.089	0.085	0.087	0.09	0.089
	00:15:00	0.087	0.086	0.084	0.085	0.083	0.084	0.086	0.092	0.089	0.087	0.087	0.085	0.087	0.091	0.089
	00:30:00	0.086	0.086	0.084	0.086	0.083	0.083	0.087	0.093	0.089	0.093	0.087	0.087	0.087	0.092	0.088
	00:45:00	0.086	0.086	0.083	0.086	0.084	0.083	0.088	0.096	0.089	0.1	0.087	0.087	0.087	0.092	0.088
	01:00:00	0.086	0.086	0.084	0.087	0.084	0.083	0.095	0.107	0.091	0.1	0.087	0.087	0.087	0.093	0.087
	01:15:00	0.086	0.086	0.084	0.088	0.084	0.085	0.097	0.107	0.093	0.111	0.089	0.092	0.091	0.096	0.089
	01:30:00	0.086	0.086	0.084	0.088	0.085	0.083	0.104	0.095	0.091	0.115	0.086	0.091	0.088	0.093	0.088
	01:45:00	0.086	0.086	0.085	0.089	0.086	0.084	0.091	0.096	0.092	0.105	0.088	0.094	0.089	0.094	0.088
	02:00:00	0.087	0.086	0.085	0.089	0.086	0.084	0.097	0.118	0.092	0.093	0.087	0.093	0.091	0.096	0.088
	02:15:00	0.087	0.086	0.085	0.09	0.086	0.084	0.094	0.12	0.093	0.09	0.088	0.093	0.091	0.095	0.089
	02:30:00	0.088	0.085	0.086	0.09	0.087	0.084	0.096	0.1	0.094	0.091	0.089	0.094	0.092	0.097	0.088
	02:45:00	0.089	0.086	0.087	0.091	0.088	0.084	0.1	0.103	0.094	0.091	0.09	0.095	0.093	0.097	0.088
	03:00:00	0.09	0.086	0.088	0.091	0.088	0.084	0.102	0.104	0.097	0.09	0.091	0.094	0.102	0.099	0.089
	03:15:00	0.094	0.087	0.089	0.092	0.089	0.085	0.113	0.117	0.098	0.093	0.092	0.097	0.099	0.1	0.092
	03:30:00	0.098	0.088	0.089	0.093	0.089	0.089	0.116	0.129	0.098	0.094	0.096	0.094	0.098	0.102	0.095
	03:45:00	0.103	0.088	0.091	0.099	0.091	0.096	0.121	0.131	0.101	0.098	0.116	0.095	0.099	0.103	0.097
	04:00:00	0.105	0.09	0.095	0.103	0.1	0.099	0.131	0.144	0.104	0.099	0.106	0.099	0.1	0.106	0.099
	04:15:00	0.108	0.09	0.095	0.108	0.106	0.098	0.132	0.152	0.116	0.105	0.129	0.1	0.102	0.109	0.102
	04:30:00	0.112	0.093	0.097	0.109	0.109	0.097	0.147	0.205	0.119	0.105	0.137	0.102	0.106	0.111	0.115
	04:45:00	0.116	0.097	0.102	0.11	0.114	0.106	0.173	0.201	0.13	0.117	0.133	0.103	0.108	0.116	0.153
	05:00:00	0.123	0.099	0.108	0.112	0.112	0.108	0.197	0.228	0.137	0.14	0.116	0.105	0.112	0.118	0.152
	05:15:00	0.128	0.104	0.111	0.116	0.116	0.119	0.176	0.194	0.145	0.158	0.117	0.114	0.113	0.123	0.138
	05:30:00	0.122	0.113	0.115	0.119	0.123	0.133	0.171	0.146	0.152	0.161	0.114	0.113	0.118	0.127	0.125
	05:45:00	0.141	0.112	0.119	0.121	0.124	0.158	0.168	0.127	0.164	0.159	0.12	0.118	0.123	0.131	0.131
	06:00:00	0.131	0.109	0.121	0.126	0.127	0.194	0.151	0.127	0.177	0.176	0.118	0.119	0.128	0.133	0.132
	06:15:00	0.13	0.111	0.123	0.132	0.132	0.197	0.132	0.129	0.193	0.15	0.124	0.127	0.132	0.144	0.139
	06:30:00	0.135	0.113	0.128	0.138	0.136	0.176	0.136	0.135	0.183	0.146	0.127	0.134	0.137	0.151	0.142
	06:45:00	0.148	0.122	0.135	0.139	0.143	0.22	0.14	0.142	0.158	0.15	0.13	0.139	0.144	0.162	0.147
	07:00:00	0.156	0.124	0.141	0.146	0.151	0.16	0.15	0.142	0.166	0.151	0.137	0.149	0.154	0.169	0.157
	07:15:00	0.159	0.134	0.145	0.155	0.157	0.147	0.155	0.15	0.157	0.163	0.144	0.162	0.167	0.185	0.163
	07:30:00	0.173	0.138	0.155	0.17	0.167	0.149	0.161	0.164	0.173	0.165	0.148	0.173	0.173	0.197	0.176
	07:45:00	0.182	0.147	0.159	0.175	0.184	0.154	0.175	0.165	0.186	0.183	0.165	0.181	0.187	0.219	0.178
	08:00:00	0.196	0.155	0.182	0.18	0.202	0.169	0.176	0.163	0.203	0.196	0.176	0.197	0.199	0.239	0.204
	08:15:00	0.218	0.168	0.186	0.209	0.223	0.19	0.193	0.191	0.22	0.208	0.189	0.223	0.234	0.254	0.204
	08:30:00	0.249	0.176	0.192	0.221	0.23	0.23	0.205	0.246	0.23	0.215	0.205	0.233	0.24	0.28	0.22
	08:45:00	0.24	0.196	0.214	0.235	0.256	0.25	0.236	0.232	0.25	0.247	0.212	0.25	0.258	0.297	0.262
	09:00:00	0.272	0.204	0.234	0.25	0.284	0.222	0.299	0.181	0.264	0.274	0.246	0.282	0.301	0.32	0.309
	09:15:00	0.287	0.226	0.258	0.272	0.311	0.244	0.312	0.199	0.32	0.332	0.228	0.288	0.339	0.329	0.32
	09:30:00	0.315	0.255	0.276	0.27	0.338	0.251	0.268	0.199	0.304	0.337	0.248	0.332	0.286	0.327	0.385
	09:45:00	0.352	0.278	0.307	0.287	0.39	0.251	0.266	0.193	0.291	0.36	0.301	0.385	0.358	0.354	0.412
	10:00:00	0.372	0.295	0.311	0.305	0.409	0.269	0.301	0.215	0.322	0.385	0.298	0.408	0.377	0.398	0.396
	10:15:00	0.41	0.312	0.376	0.332	0.419	0.276	0.32	0.243	0.34	0.358	0.332	0.406	0.388	0.431	0.394
	10:30:00	0.468	0.35	0.427	0.379	0.414	0.309	0.405	0.285	0.434	0.399	0.329	0.444	0.44	0.432	0.387
	10:45:00	0.507	0.352	0.403	0.424	0.471	0.355	0.494	0.349	0.523	0.51	0.374	0.44	0.541	0.462	0.445
	11:00:00	0.621	0.366	0.404	0.48	0.558	0.455	0.546	0.462	0.553	0.601	0.479	0.52	0.626	0.546	0.531
	11:15:00	0.64	0.378	0.538	0.509	0.611	0.483	0.608	0.497	0.65	0.661	0.58	0.638	0.715	0.679	0.586
	11:30:00	0.684	0.46	0.546	0.492	0.66	0.585	0.671	0.523	0.695	0.705	0.673	0.678	0.754	0.765	0.682
	11:45:00	0.732	0.533	0.617	0.574	0.76	0.653	0.778	0.633	0.747	0.777	0.744	0.746	0.801	0.822	0.763
	12:00:00	0.757	0.613	0.645	0.719	0.763	0.706	0.808	0.696	0.798	0.825	0.786	0.752	0.812	0.853	0.778
	12:15:00	0.827	0.681	0.678	0.822	0.797	0.754	0.821	0.729	0.789	0.853	0.821	0.78	0.847	0.858	0.805
	12:30:00	0.842	0.737	0.719	0.853	0.829	0.767	0.829	0.754	0.809	0.861	0.853	0.786	0.865	0.872	0.823
	12:45:00	0.86	0.757	0.738	0.882	0.848	0.793	0.84	0.801	0.829	0.895	0.89	0.798	0.881	0.868	0.843
	13:00:00	0.892	0.791	0.773	0.89	0.865	0.807	0.861	0.828	0.844	0.914	0.897	0.83	0.884	0.888	0.863
	13:15:00	0.9	0.807	0.783	0.908	0.886	0.828	0.873	0.865	0.856	0.932	0.919	0.833	0.91	0.901	0.87
	13:30:00	0.91	0.833	0.798	0.92	0.897	0.851	0.893	0.873	0.871	0.958	0.926	0.849	0.907	0.9	0.883
	13:45:00	0.917	0.837	0.833	0.934	0.918	0.866	0.891	0.91	0.884	0.97	0.936	0.858	0.933	0.924	0.89
	14:00:00	0.94	0.866	0.847	0.951	0.935	0.902	0.916	0.938	0.903	0.975	0.954	0.858	0.953	0.942	0.895
	14:15:00	0.956	0.886	0.862	0.974	0.943	0.903	0.932	0.954	0.908	0.979	0.955	0.873	0.959	0.952	0.902
	14:30:00	0.991	0.899	0.878	0.992	0.96	0.905	0.95	0.983	0.933	1.003	0.99	0.879	0.967	0.967	0.916
	14:45:00	1	0.912	0.9	1.021	0.989	0.941	0.958	1.019	0.941	1.013	1	0.899	0.977	0.97	0.928
	15:00:00	1.022	0.925	0.919	1.035	1.003	0.932	0.972	1.005	0.946	1.027	1.015	0.895	0.998	0.979	0.936
	15:15:00	1.015	0.949	0.92	1.05	0.999	0.952	0.999	1.057	0.955	1.035	1.015	0.921	1	0.993	0.95
	15:30:00	1.033	0.961	0.95	1.066	1.011	0.968	1.011	1.112	0.979	1.063	1.041	0.926	1.016	1	0.962
	15:45:00	1.047	0.975	0.972	1.092	1.028	0.977	1.006	1.105	0.975	1.057	1.036	0.914	1.028	1.006	0.971
	16:00:00	1.056	0.991	0.971	1.093	1.027	0.995	1.025	1.13	0.982	1.055	1.044	0.924	1.029	1.02	0.967
	16:15:00	1.066	0.997	0.988	1.108	1.041	1.002	1.021	1.149	0.993	1.041	1.05	0.936	1.025	1.026	0.979
	16:30:00	1.045	1.029	1.007	1.114	1.039	0.988	1.003	1.178	0.983	1.038	1.035	0.943	1.03	1.027	0.98
	16:45:00	1.077	1.02	1.011	1.125	1.044	0.989	1.005	1.182	0.981	1.04	1.044	0.938	1.019	1.031	0.98
	17:00:00	1.083	1.017	1.008	1.117	1.047	1.003	1.04	1.205	0.978	1.041	1.043	0.925	1.017	1.03	0.971
	17:15:00	1.064	1.016	1.014	1.122	1.045	1.013	1.067	1.207	0.979	1.045	1.03	0.926	1.024	1.024	0.982
	17:30:00	1.083	1.023	1.006	1.113	1.04	1.008	1.036	1.19	0.975	1.032	1.038	0.926	1.023	1.018	0.967
	17:45:00	1.115	1.026	1.02	1.128	1.04	1.011	1.069	1.205	0.986	1.029	1.027	0.912	1.015	1.02	0.961
	18:00:00	1.115	1.027	1.024	1.12	1.029	1.019	1.075	1.2	0.981	1.036	0.993	0.92	1.012	1.021	0.968
	18:15:00	1.106	1.023	1.04	1.114	1.029	1.027	1.047	1.199	0.965	1.024	1.026	0.898	1.013	1.013	0.962
	18:30:00	1.136	1.022	1.038	1.113	1.027	1.014	1.08	1.198	0.965	1.026	1.021	0.913	1.006	1.017	0.959
	18:45:00	1.139	1.02	1.053	1.118	1.034	1.016	1.076	1.203	0.975	1.036	1.031	0.894	1.009	1.01	0.95
	19:00:00	1.138	1.023	1.061	1.124	1.03	1.035	1.088	1.211	0.976	1.021	1.007	0.914	1.017	1.009	0.959
	19:15:00	1.151	1.006	1.056	1.111	1.028	1.052	1.089	1.201	0.99	1.035	0.983	0.919	1.019	1.015	0.956
	19:30:00	1.131	1.007	1.078	1.123	1.03	1.05	1.088	1.198	1.001	1.021	1.004	0.914	1.022	1.004	0.964
	19:45:00	1.155	1.016	1.076	1.115	1.032	1.076	1.106	1.195	0.991	1.025	1.011	0.903	1.017	1.016	0.974
	20:00:00	1.162	1.017	1.083	1.118	1.034	1.072	1.093	1.198	0.987	1.013	1.018	0.907	1.026	1.01	0.958
