# Supplementary material for: Modular, robust, and extendible multicellular circuit design in yeast
Source: eLife. 2022 Mar 21;11:e74540. doi: 10.7554/eLife.74540 (PMC9000959; doi:10.7554/eLife.74540)
Supplement: Figure 4—source data 1. [file elife-74540-fig4-data1.xlsx]

## Sheet: Figure 4
	Figure 4 a															Figure 4 b
	AND gate - 4-NODE network															NOR - 4-NODE network			DATE	21-01-15											NAND - 3-NODE network			DATE	21-01-15											OR gate - 2-NODE network			DATE
	Strains															Strains															Strains															Strains
	IAA-|2xGFP			Average - SteadyState					STDEV - steady state							IAA-|2xGFP			Average - SteadyState					STDEV - steady state							IAA-|2xGFP			Average - SteadyState					STDEV - steady state							IAA->GFP			Average - SteadyState
	beta-|IAA			control	beta100nM	alpha1uM	alpha1uM+beta100nM		control	alpha1uM	beta100nM	alpha1uM+beta100nM				alpha->IAA			control	beta100nM	IAA5uM	IAA5uM+beta100nM		control	alpha1uM	beta100nM	alpha1uM+beta100nM				alpha->IAA			control	alpha1uM	beta100nM	alpha1uM+beta100nM		control	alpha1uM	beta100nM					alpha->IAA			control
	alpha-|IAA			16.4707	16.634	19.9204	29.8009		0.282918	0.114405	0.533474	1.19341				beta->IAA			31.774	20.7269	15.4909	15.1157		0.525744	1.67104	0.405401	0.038857				beta->IAA			31.2566	26.4881	24.9126	14.1167		0.602955	0.295939	0.969938	0.938335				beta->IAA			9.09049
	beta->GH3															IAA->BAR1															beta-|IAA
	beta-|alpha															alpha->BAR1		Simulation (T=12hr)	control	beta100nM	IAA5uM	IAA5uM+beta100nM
			Simulation (T=12hr)	control	beta100nM	alpha1uM	alpha1uM+beta100nM												33.2722	16.9259	13.6673	12.8527											Simulation (T=12hr)	control	alpha1uM	beta100nM	alpha1uM+beta100nM												Simulation (T=12hr)
				16.2361	18.2562	18.2693	25.4355																											34.8105	23.8007	23.8007	18.9317												9.99174
[truncated: 7 more columns]

## Sheet: supplement 1
	AND gates
	2-NODE network			DATE	20-12-22											3-NODE network			DATE	21-01-15										4-NODE network			DATE	21-01-15
	Strains															Strains														Strains
	IAA-|2xGFP			Average - SteadyState					STDEV - steady state							alpha-|GFP			Average - SteadyState					STDEV - steady state						IAA-|2xGFP			Average - SteadyState					STDEV - steady state
	beta-|IAA			control	alpha1uM	beta100nM	alpha1uM+beta100nM		control	alpha1uM	beta100nM	alpha1uM+beta100nM				IAA-|alpha			control	beta100nM	IAA5uM	IAA5uM+beta100nM		control	alpha1uM	beta100nM	alpha1uM+beta100nM			beta-|IAA			control	beta100nM	alpha1uM	alpha1uM+beta100nM		control	alpha1uM	beta100nM	alpha1uM+beta100nM
	alpha-|IAA			21.5551	22.9822	22.1829	31.9737		0.365047	0.419315	0.0757315	0.248012				beta-|IAA			6.15643	6.20165	7.41776	9.40393		0.0970674	0.0925119	0.151306	0.175595			alpha-|IAA			16.4707	16.634	19.9204	29.8009		0.282918	0.114405	0.533474	1.19341
																beta-|alpha														beta->GH3
																														beta-|alpha
			Simulation (T=12hr)	control	alpha1uM	beta100nM	alpha1uM+beta100nM											Simulation (T=12hr)	control	beta100nM	IAA5uM	IAA5uM+beta100nM										Simulation (T=12hr)	control	beta100nM	alpha1uM	alpha1uM+beta100nM
				17.8735	18.0914	22.7159	24.8963												4.34953	4.62409	5.16582	6.32102											16.2361	18.2562	18.2693	25.4355

## Sheet: supplement 2
	OR gates
	2-NODE network			DATE	21-01-15											3-NODE network			DATE	21-01-15										4-NODE network			DATE	21-01-15
	Strains															Strains														Strains
	IAA->GFP			Average - SteadyState					STDEV - steady state							IAA->GFP			Average - SteadyState					STDEV - steady state						IAA->GFP			Average - SteadyState					STDEV - steady state
	alpha->IAA			control	alpha1uM	beta100nM	alpha1uM+beta100nM		control	alpha1uM	beta100nM	alpha1uM+beta100nM				alpha->IAA			control	alpha1uM	beta100nM	alpha1uM+beta100nM		control	alpha1uM	beta100nM	alpha1uM+beta100nM			alpha->IAA			control	alpha1uM	beta100nM	alpha1uM+beta100nM		control	alpha1uM	beta100nM	alpha1uM+beta100nM
	beta->IAA			9.09049	19.3745	22.9113	26.4971		0.509684	0.0929085	0.369386	0.309859				beta->IAA			8.66817	17.7513	21.2518	24.128		0.06132	0.345874	0.700119	0.27029			beta->IAA			8.80797	16.4542	20.3465	23.0513		0.408473	0.404493	0.205548	1.01092
																beta->GH3														beta->alpha
																														IAA-|GH3
				Simulation (T=12hr)															Simulation (T=12hr)														Simulation (T=12hr)
				9.99174	15.1821	21.8552	22.3194												9.97969	15.0789	22.1752	22.574											10.0191	15.357	21.8979	22.3776

## Sheet: supplement 3
	NAND gates
	2-NODE network			DATE	21-01-15											3-NODE network			DATE	21-01-15										4-NODE network			DATE	21-01-15
	Strains															Strains														Strains
	IAA-|2xGFP			Average - SteadyState					STDEV - steady state							IAA-|2xGFP			Average - SteadyState					STDEV - steady state						IAA-|2xGFP			Average - SteadyState					STDEV - steady state
	alpha->IAA			control	alpha1uM	beta100nM	alpha1uM+beta100nM		control	alpha1uM	beta100nM	alpha1uM+beta100nM				alpha->IAA			control	alpha1uM	beta100nM	alpha1uM+beta100nM		control	alpha1uM	beta100nM	alpha1uM+beta100nM			alpha->IAA			control	beta100nM	IAA5uM	IAA5uM+beta100nM		control	alpha1uM	beta100nM	alpha1uM+beta100nM
	beta->IAA			30.3729	26.7968	23.8465	13.5596		1.22363	0.876476	0.0888077	0.203742				beta->IAA			31.2566	26.4881	24.9126	14.1167		0.602955	0.295939	0.969938	0.938335			beta->IAA			32.9349	29.4871	20.5428	15.5405		1.21983	0.682495	0.750282	0.494144
																beta-|IAA														IAA-|GH3
																														alpha->BAR1
			Simulation (T=12hr)	control	alpha1uM	beta100nM	alpha1uM+beta100nM											Simulation (T=12hr)	control	alpha1uM	beta100nM	alpha1uM+beta100nM										Simulation (T=12hr)	control	beta100nM	IAA5uM	IAA5uM+beta100nM
				34.5106	22.5581	14.1351	13.6673												34.8105	23.8007	23.8007	18.9317											35.7403	23.58	23.58	18.7582

## Sheet: supplement 4
	NOR gates
	2-NODE network			DATE	21-01-15											3-NODE network			DATE	21-01-15										4-NODE network			DATE	21-01-15
	Strains															Strains														Strains
	IAA-|2xGFP			Average - SteadyState					STDEV - steady state							IAA-|2xGFP			Average - SteadyState					STDEV - steady state						IAA-|2xGFP			Average - SteadyState					STDEV - steady state
	alpha->IAA			control	alpha1uM	beta100nM	alpha1uM+beta100nM		control	alpha1uM	beta100nM	alpha1uM+beta100nM				alpha->IAA			control	alpha1uM	beta100nM	alpha1uM+beta100nM		control	alpha1uM	beta100nM	alpha1uM+beta100nM			alpha->IAA			control	beta100nM	IAA5uM	IAA5uM+beta100nM		control	alpha1uM	beta100nM	alpha1uM+beta100nM
	beta->IAA			37.5891	21.282	21.442	18.732		0.397394	0.251585	0.302313	0.303124				beta->IAA			20.0924	13.6049	13.7323	13.7152		6.76637	1.22331	0.552263	0.370655			beta->IAA			31.774	20.7269	15.4909	15.1157		0.525744	1.67104	0.405401	0.038857
																beta-|IAA														IAA->BAR1
			Simulation (T=12hr)	control	alpha1uM	beta100nM	alpha1uM+beta100nM											Simulation (T=12hr)	control	alpha1uM	beta100nM	alpha1uM+beta100nM								alpha->BAR1		Simulation (T=12hr)	control	beta100nM	IAA5uM	IAA5uM+beta100nM
				35.3701	19.3812	14.5943	13.6673												34.768	15.2919	14.2882	12.8329											33.2722	16.9259	13.6673	12.8527
