# Supplementary material for: Modular, robust, and extendible multicellular circuit design in yeast
Source: eLife. 2022 Mar 21;11:e74540. doi: 10.7554/eLife.74540 (PMC9000959; doi:10.7554/eLife.74540)
Supplement: Figure 5—source data 1. [file elife-74540-fig5-data1.xlsx]

## Sheet: Figure 5
	Figure 5 a							Figure 5 b
	Time series							Steady State
		Total topologies/inputs considered	Total nonmonotonic	Percentage of the total					Total topologies/inputs considered	Total nonmonotonic	Percentage of the total
	2-node Network	21000	112	0.533333				2-node Network	4200	17	0.404762
	3-node Network	98000	539	0.55				3-node Network	19600	75	0.382653
	4-node Network	318500	1516	0.475981				4-node Network	63700	111	0.174254
	Figure 5 c							Figure 5 d
	Time	Average	STDEV						Average
	0.0882731	2.0621	0.393031					Time (hrs)	alpha1nM	alpha5nM	alpha10nM
	0.746079	3.41566	0.998454					0	31.5362	30.4545	32.1941
	1.21753	5.51428	0.693009					3	30.5833	27.1744	25.2785
	1.64941	8.54101	1.31078					5	27.9279	22.168	21.4138
	2.07777	9.56979	3.6174					8	26.2578	19.0942	18.9441
	2.58158	12.4843	0.304752					10	27.9338	23.0982	21.8041
	3.01863	14.5877	0.984985					12	32.6006	27.3024	25.0496
	4.09444	16.6441	1.54689					14	32.6332	30.4965	29.4444
	4.90359	15.533	2.84732						STDEV
	8.30354	7.4622	2.65839					Time (hrs)	alpha1nM	alpha5nM	alpha10nM
	9.16749	6.28094	2.12915					0	0.471853	1.38365	0.705337
	10.0482	5.52409	0.342152					3	1.43607	2.56269	2.80773
	11.2278	5.78934	0.541098					5	0.464276	0.40337	1.84015
	12.1441	4.67489	0.607148					8	1.12068	0.414185	0.513761
								10	0.49296	0.191996	0.54575
								12	0.505839	2.26466	1.03388
								14	0.499399	1.22833	0.789815
	Figure 5 e							Figure 5 f
		IFFL1	SS at 12hr					IFFL2	SS at 14hr
	alpha (nM)	Average	STDEV					beta=5nM
	1	9.5577	0.172478					alpha-factor (nM)	Average	STDEV
	5	11.3463	0.195162					0.5	22.7858	2.08242
	10	11.2412	0.571781					1	12.4894	0.675883
	50	13.806	0.254534					5	11.5748	0.837846
	100	10.715	0.201601					10	21.7408	2.71947
	200	9.78364	0.154758					50	23.0774	0.926049
	1000	9.78364	0.379774					1000	24.2886	0.409841
