# Supplementary material for: Modular, robust, and extendible multicellular circuit design in yeast
Source: eLife journal article supplement (doi:10.7554/elife.74540), 2022-03-21
Supplement: supp [file elife_poa_e74540_Figure_1_figure_supplement_1.pdf › elife_poa_e74540_Figure_1_figure_supplement_1.pdf]

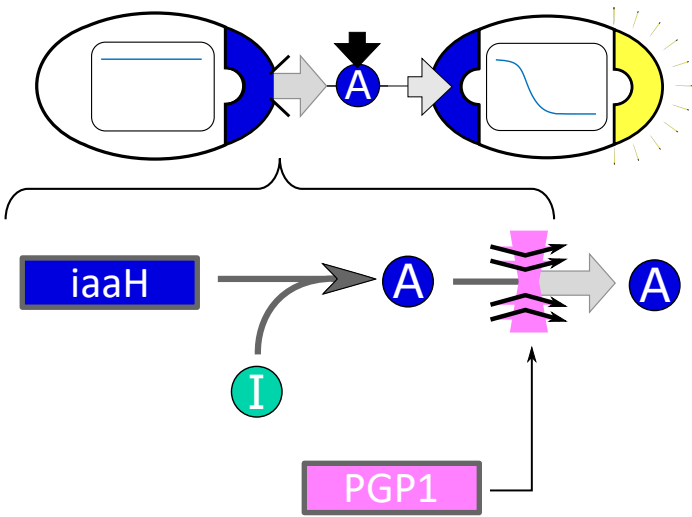

Relative steady state fluorescence

1.4  
1.2  
1  
0.8  
0.6  
0.4  
0.2  
0

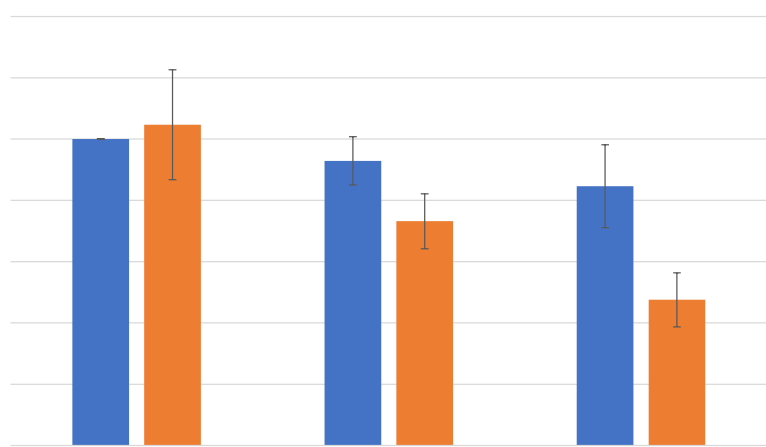

Sensor

Sensor + Sender  
(*iaaH*)

Sensor + Sender  
(*iaaH*+PGP1)

Control 300μM IAM
