# Supplementary figures and images for: Modular, robust, and extendible multicellular circuit design in yeast
Source: eLife journal article supplement (doi:10.7554/elife.74540), 2022-03-21

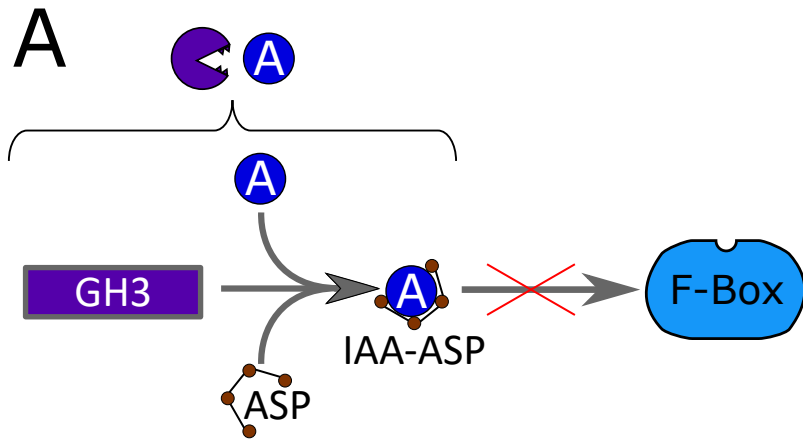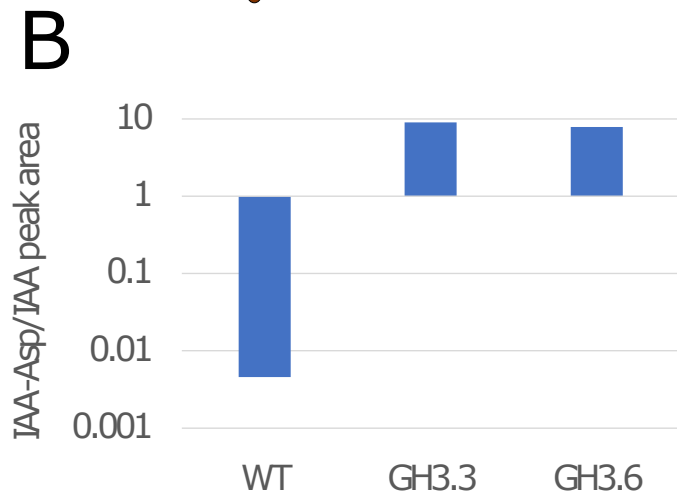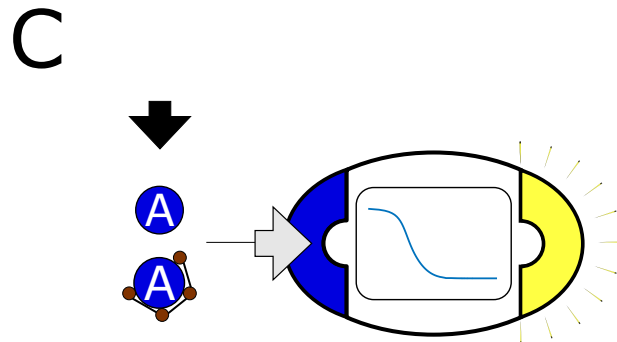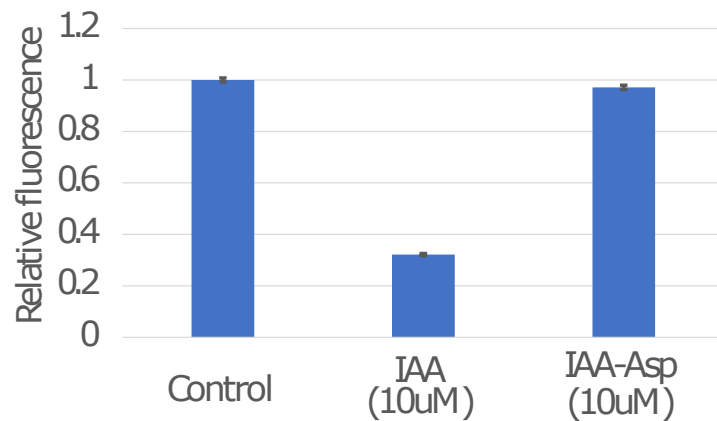

Supplement: supp [file elife_poa_e74540_Figure_1_figure_supplement_2.pdf › elife_poa_e74540_Figure_1_figure_supplement_2.pdf]

16-12-21 WT Sm (Mn, 1x2)

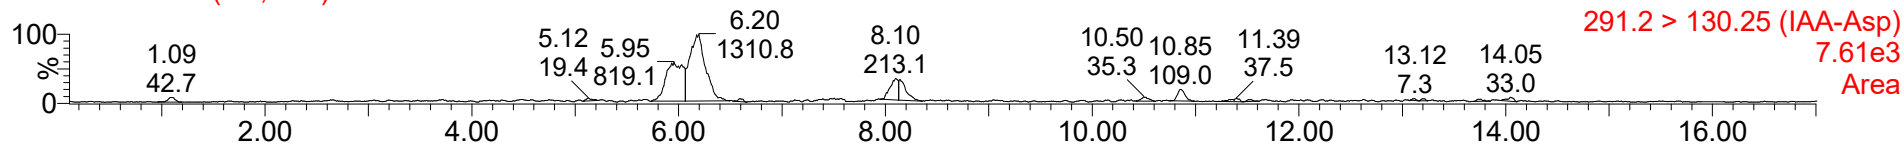

16-12-21 GH33 Sm (Mn, 1x2)

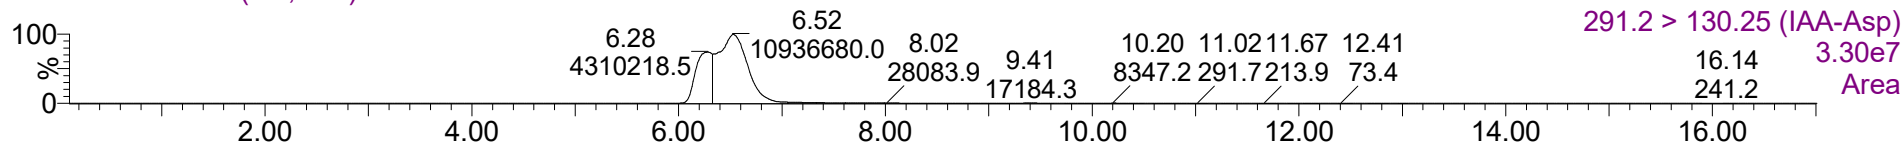

16-12-21 GH36 Sm (Mn, 1x2)

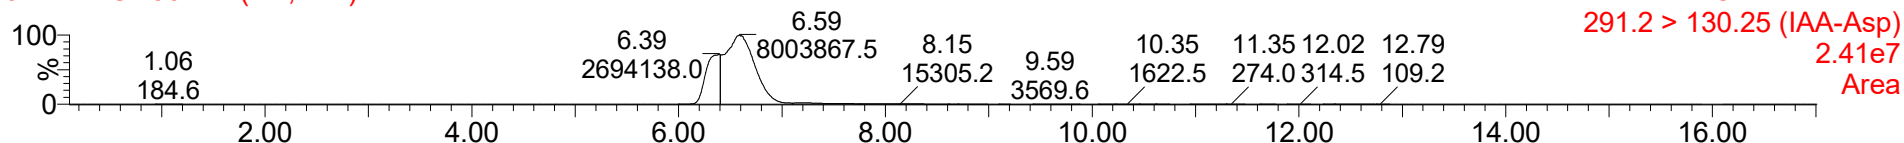

16-12-21 GH33GH36 Sm (Mn, 1x2)

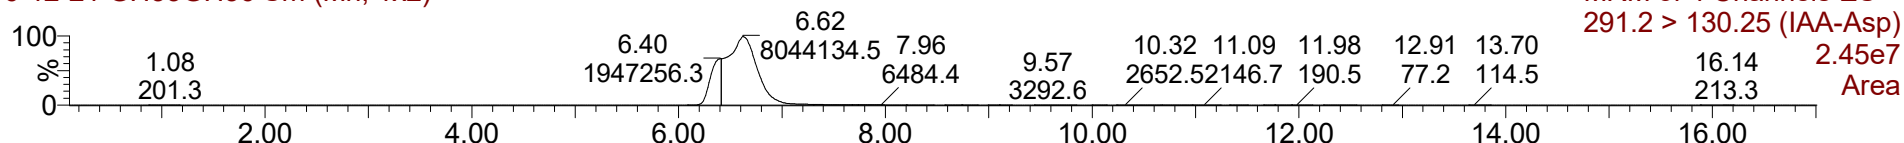

16-12-21 GH33GH36 Sm (Mn, 1x2)

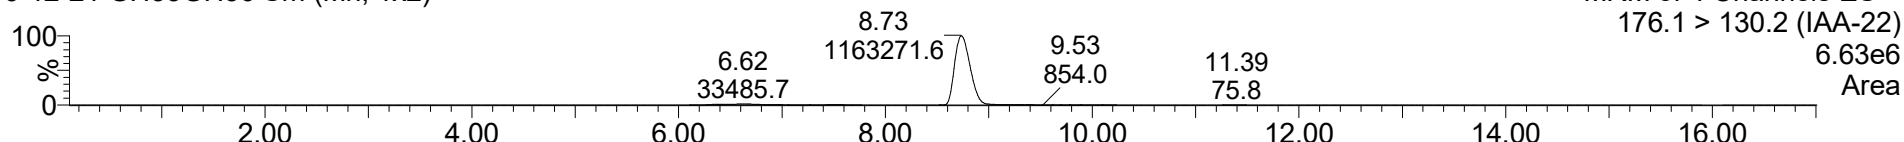

16-12-21 GH36 Sm (Mn, 1x2)

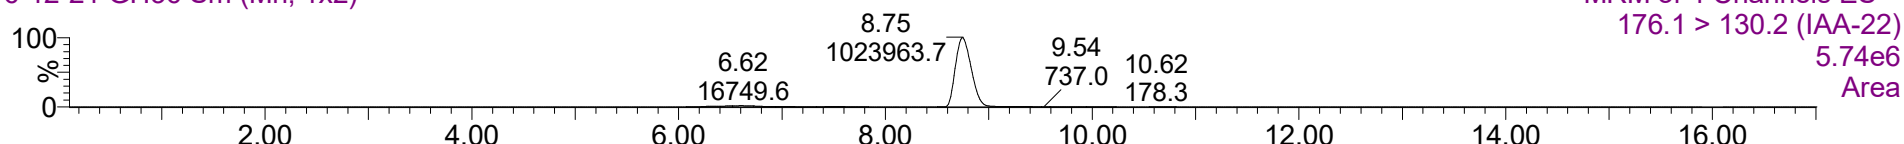

16-12-21 GH33 Sm (Mn, 1x2)

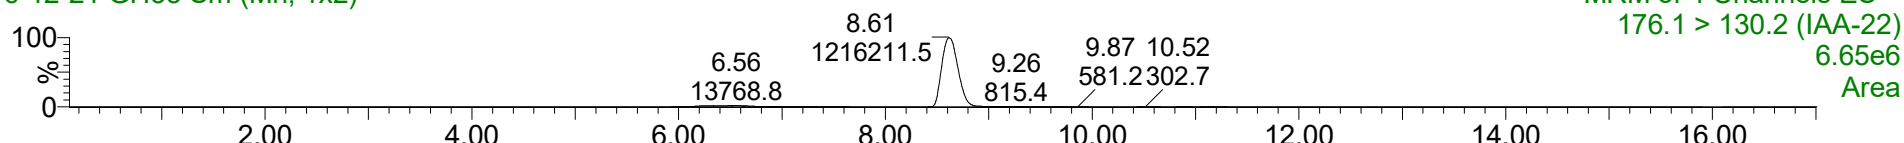

16-12-21 WT Sm (Mn, 1x2)

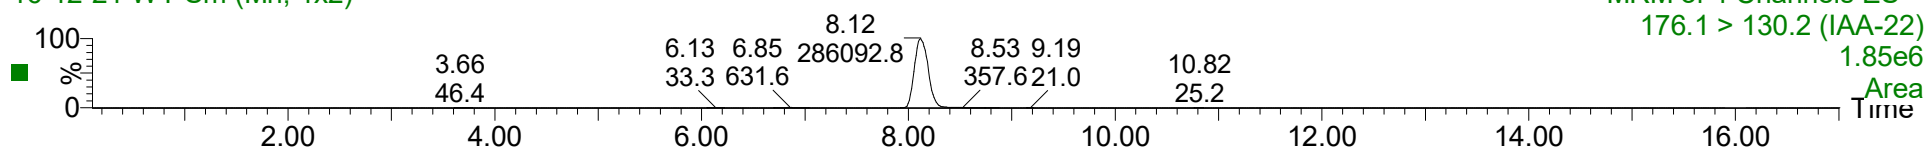

Supplement: supp [file elife_poa_e74540_Figure_1_figure_supplement_3.pdf › elife_poa_e74540_Figure_1_figure_supplement_3.pdf]

A

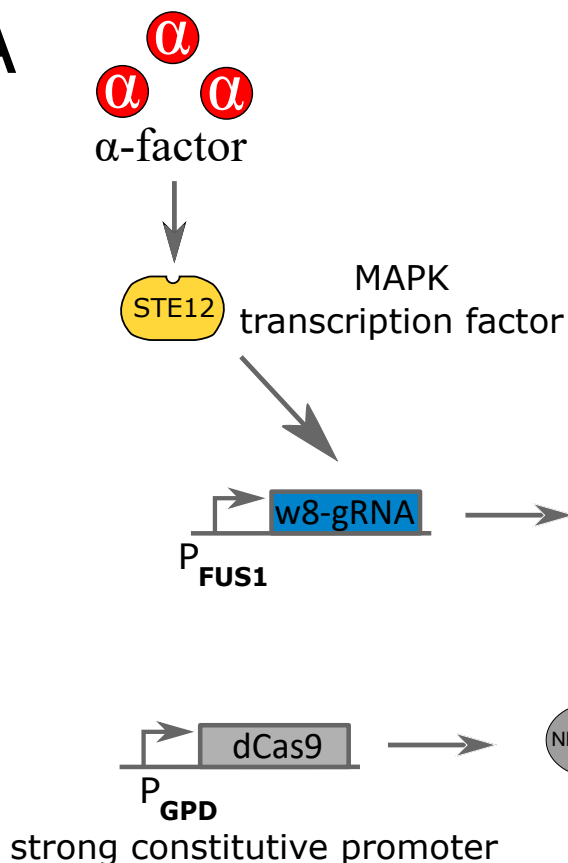

B

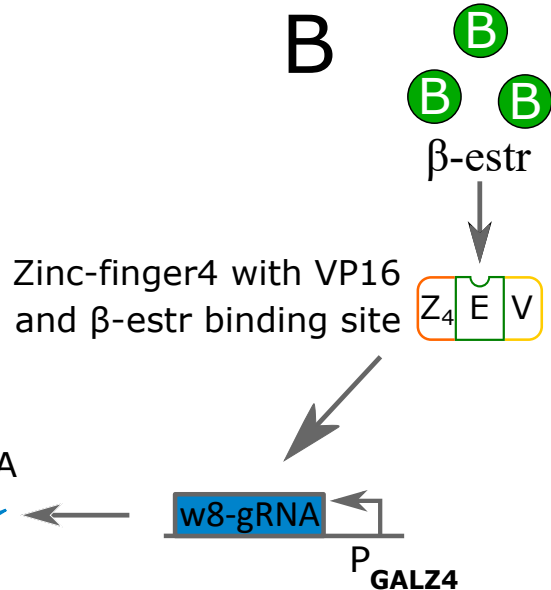

Supplement: supp [file elife_poa_e74540_Figure_1_figure_supplement_4.pdf › elife_poa_e74540_Figure_1_figure_supplement_4.pdf]

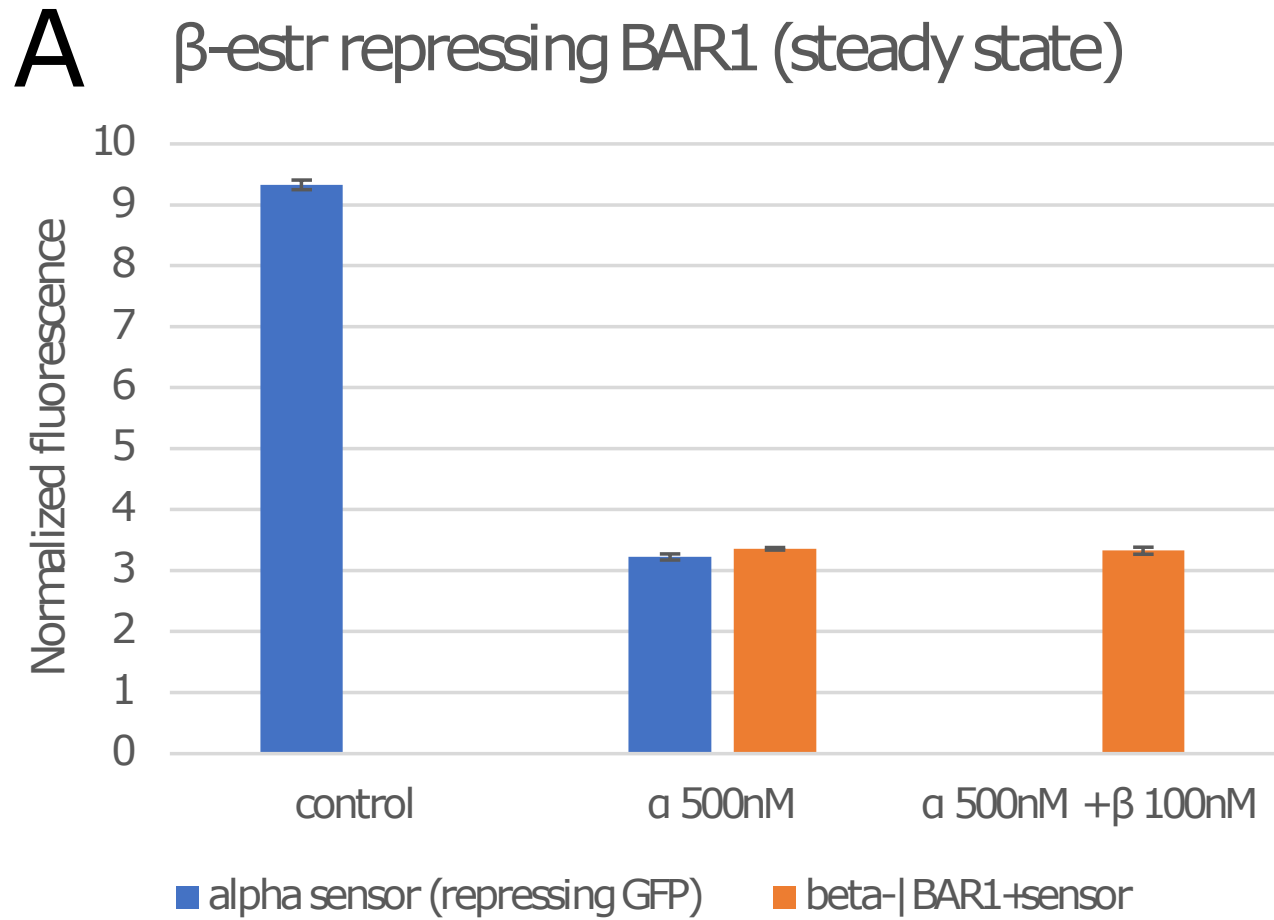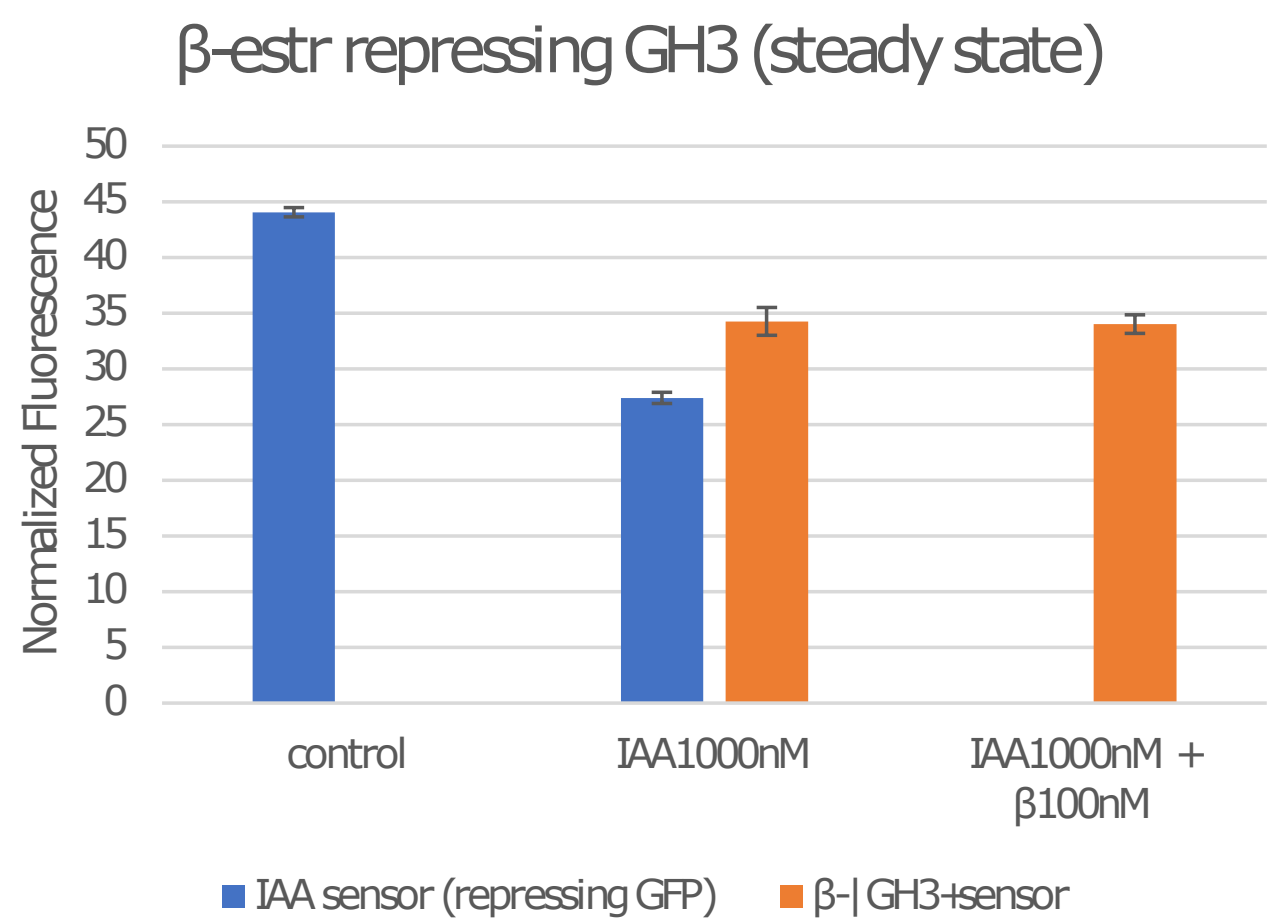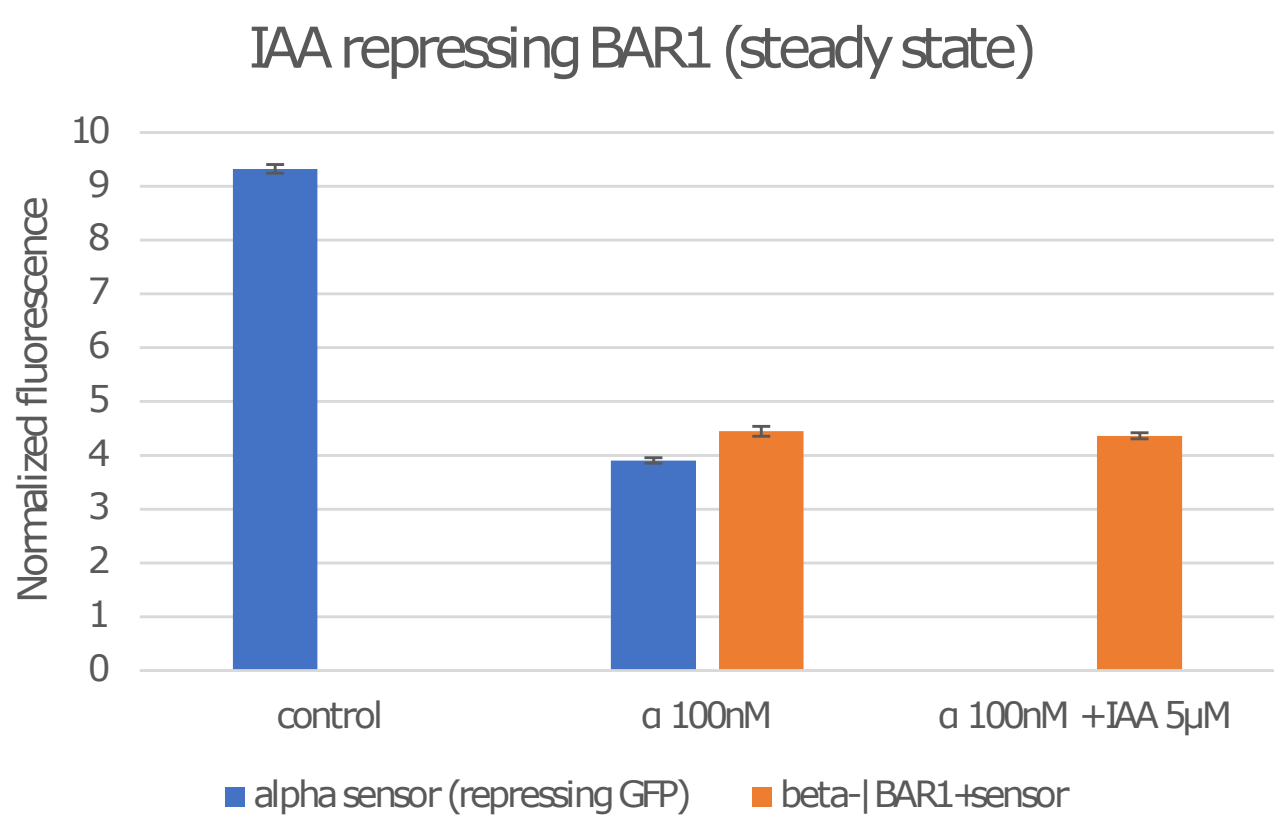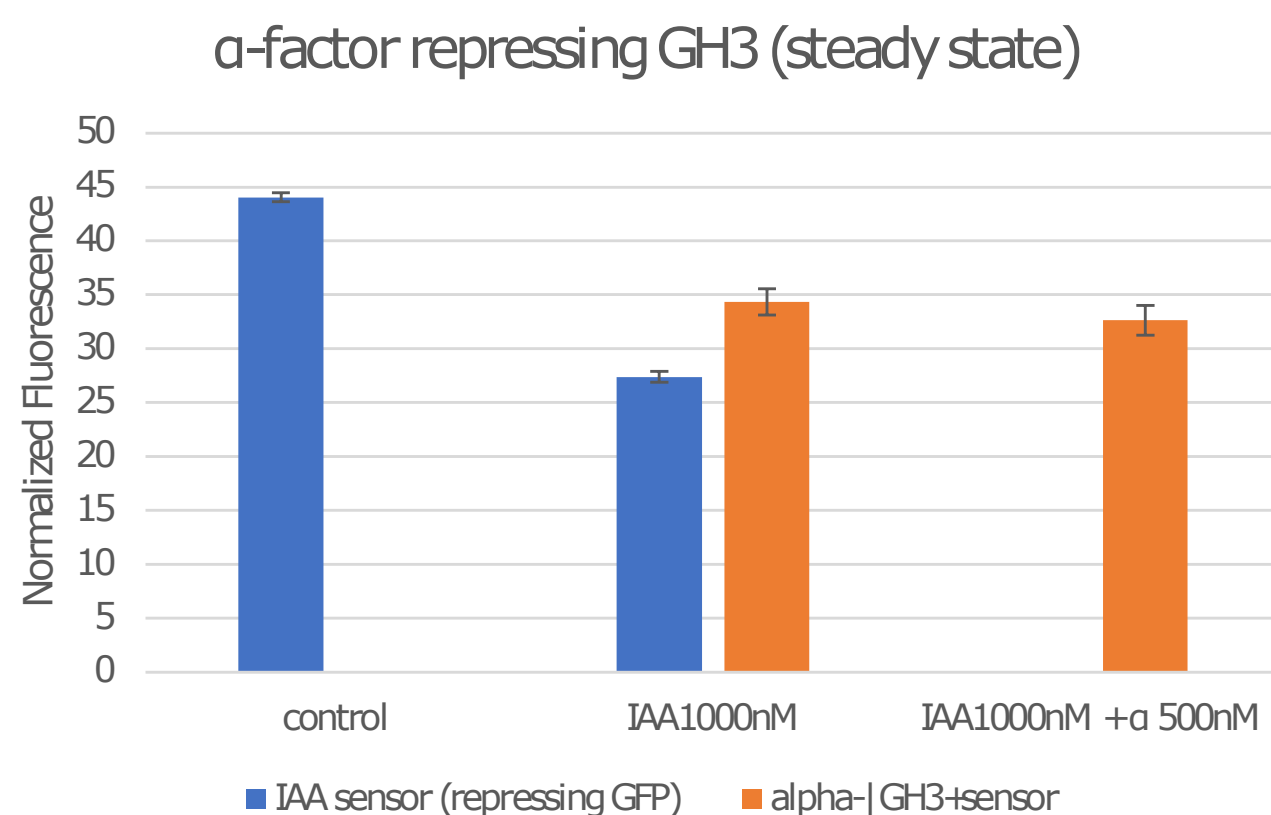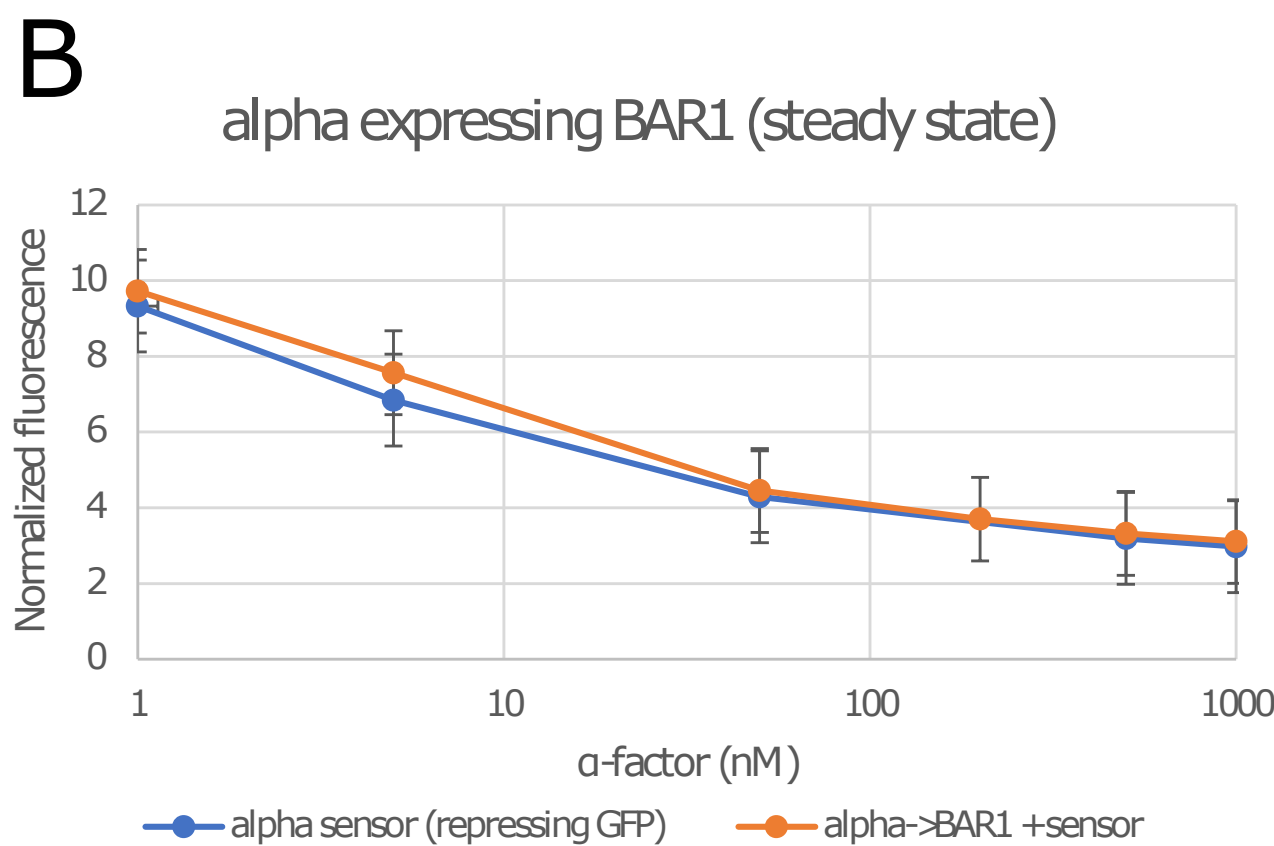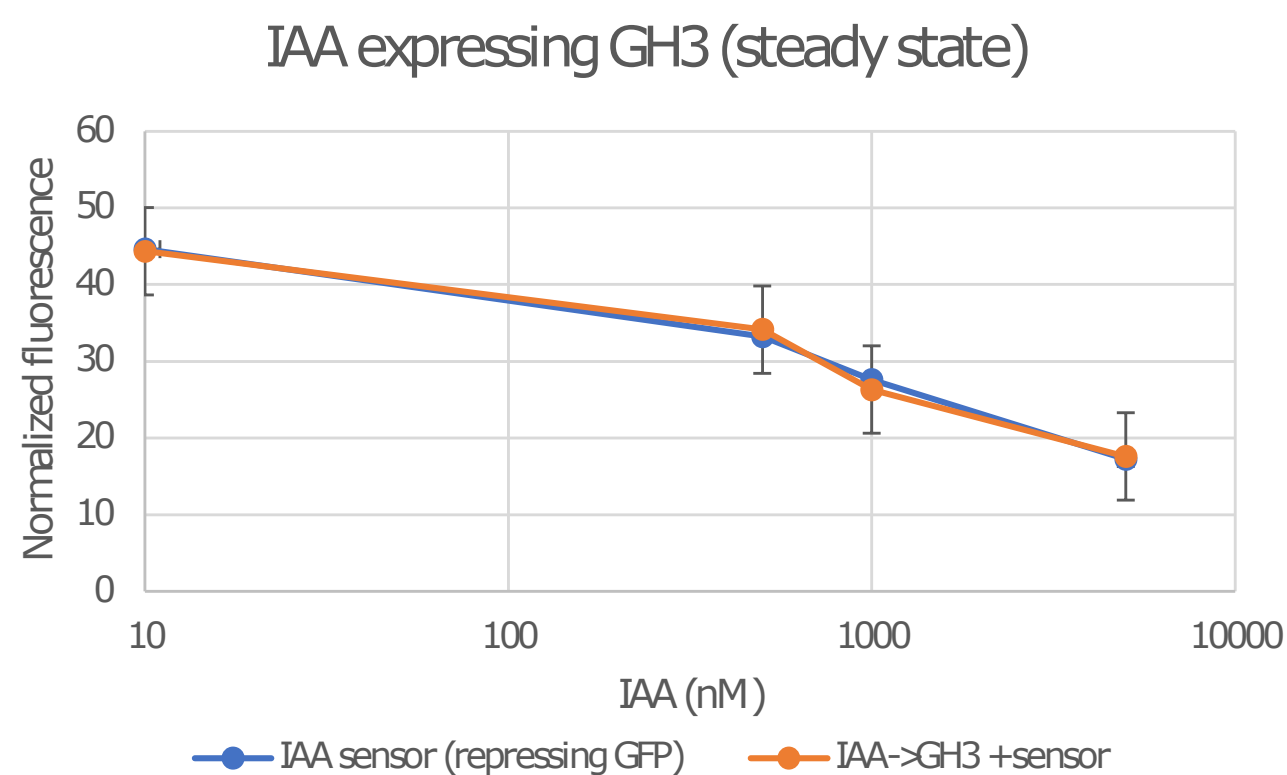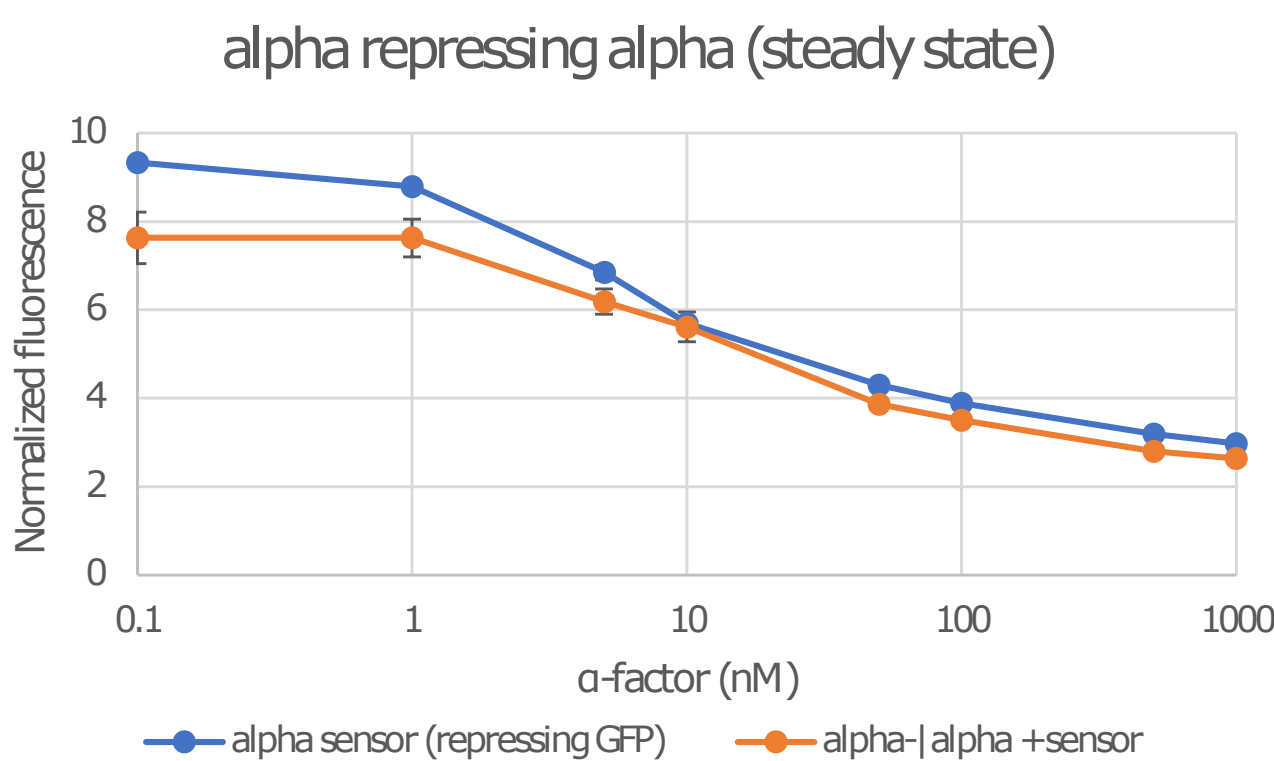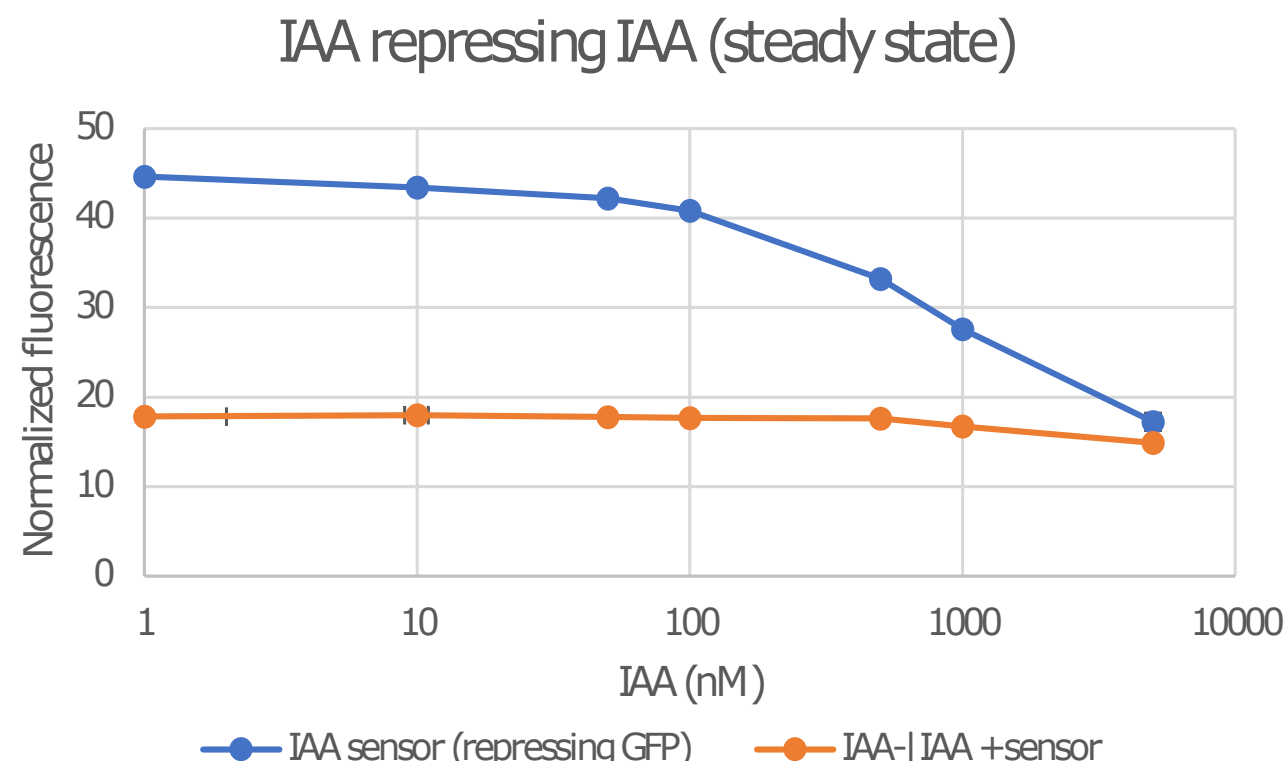

Supplement: supp [file elife_poa_e74540_Figure_1_figure_supplement_6.pdf › elife_poa_e74540_Figure_1_figure_supplement_6.pdf]

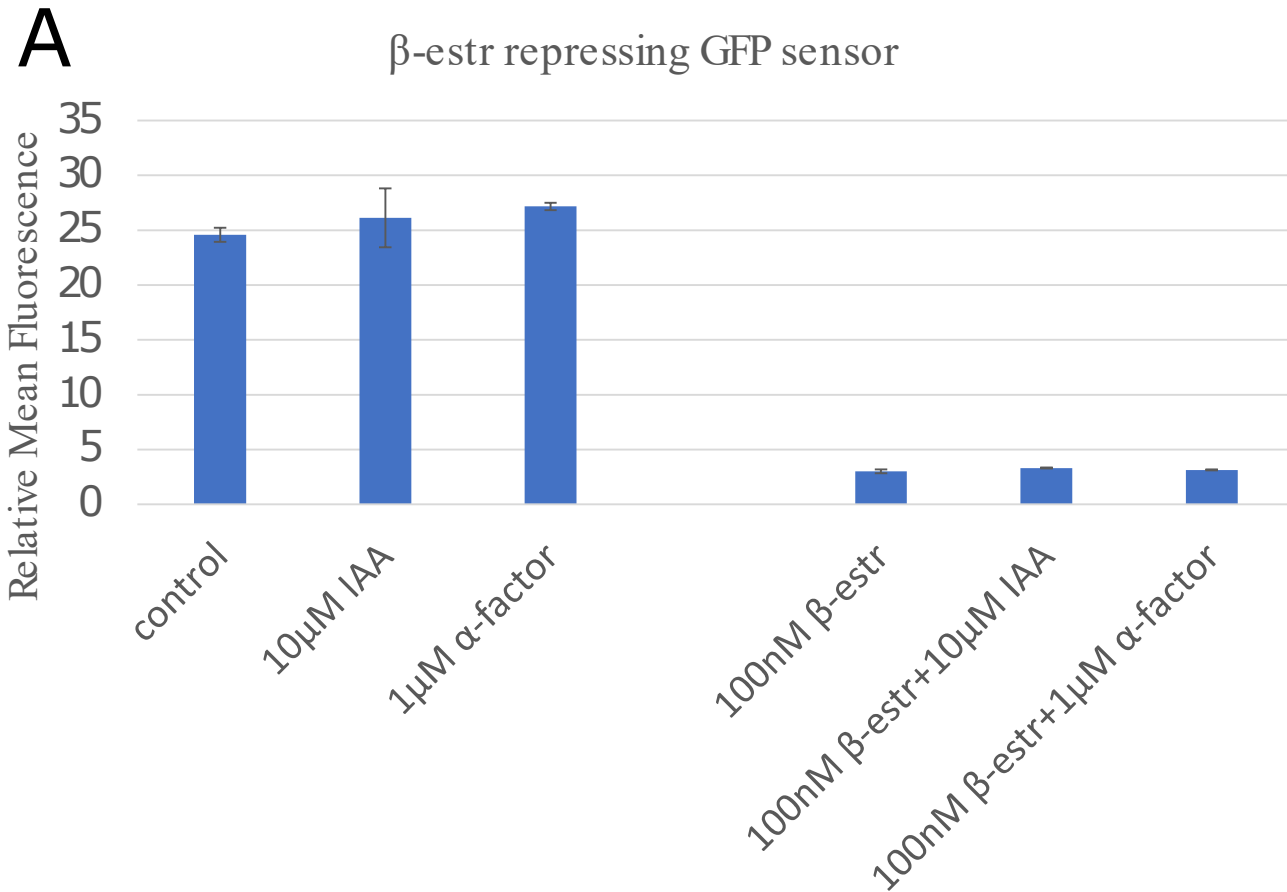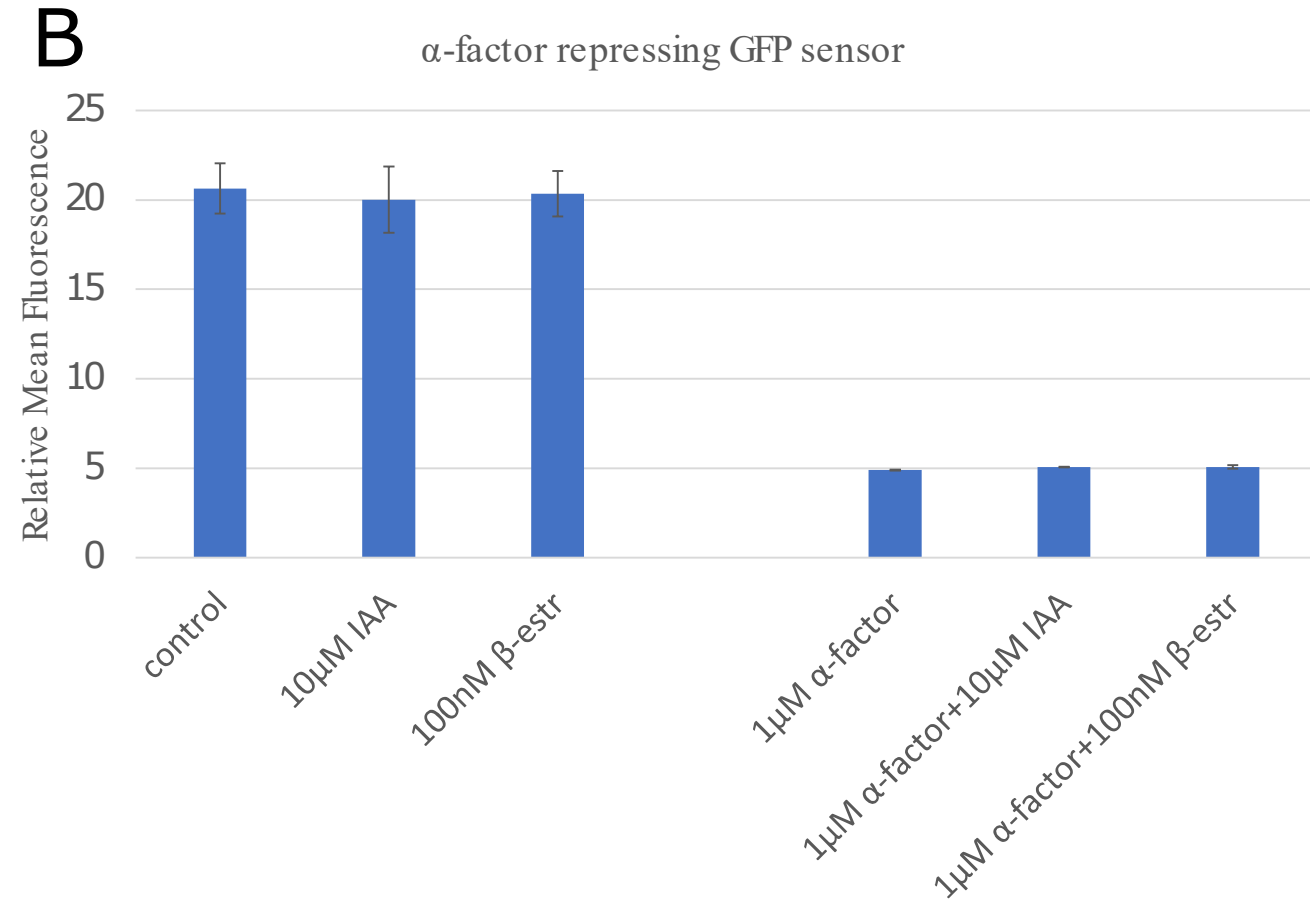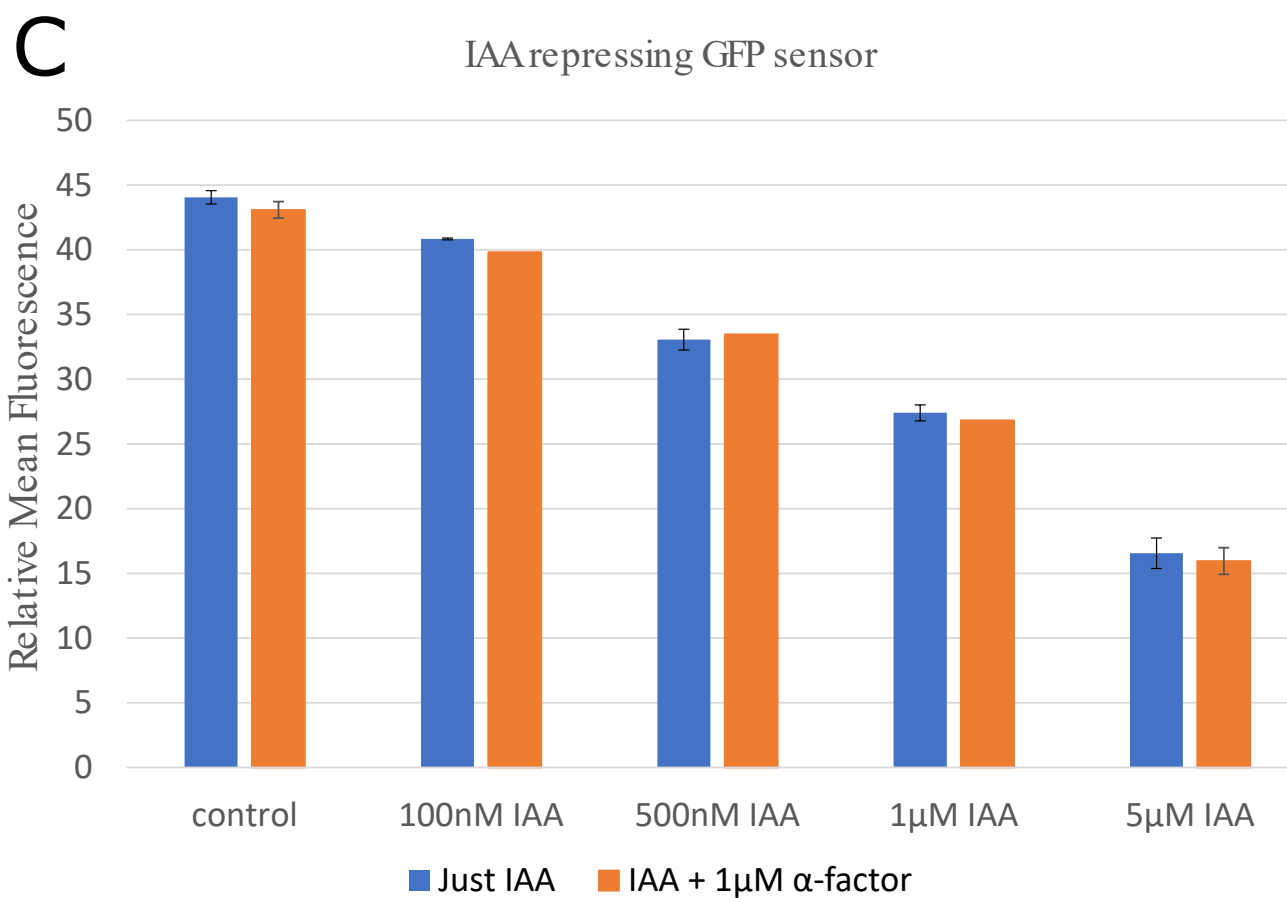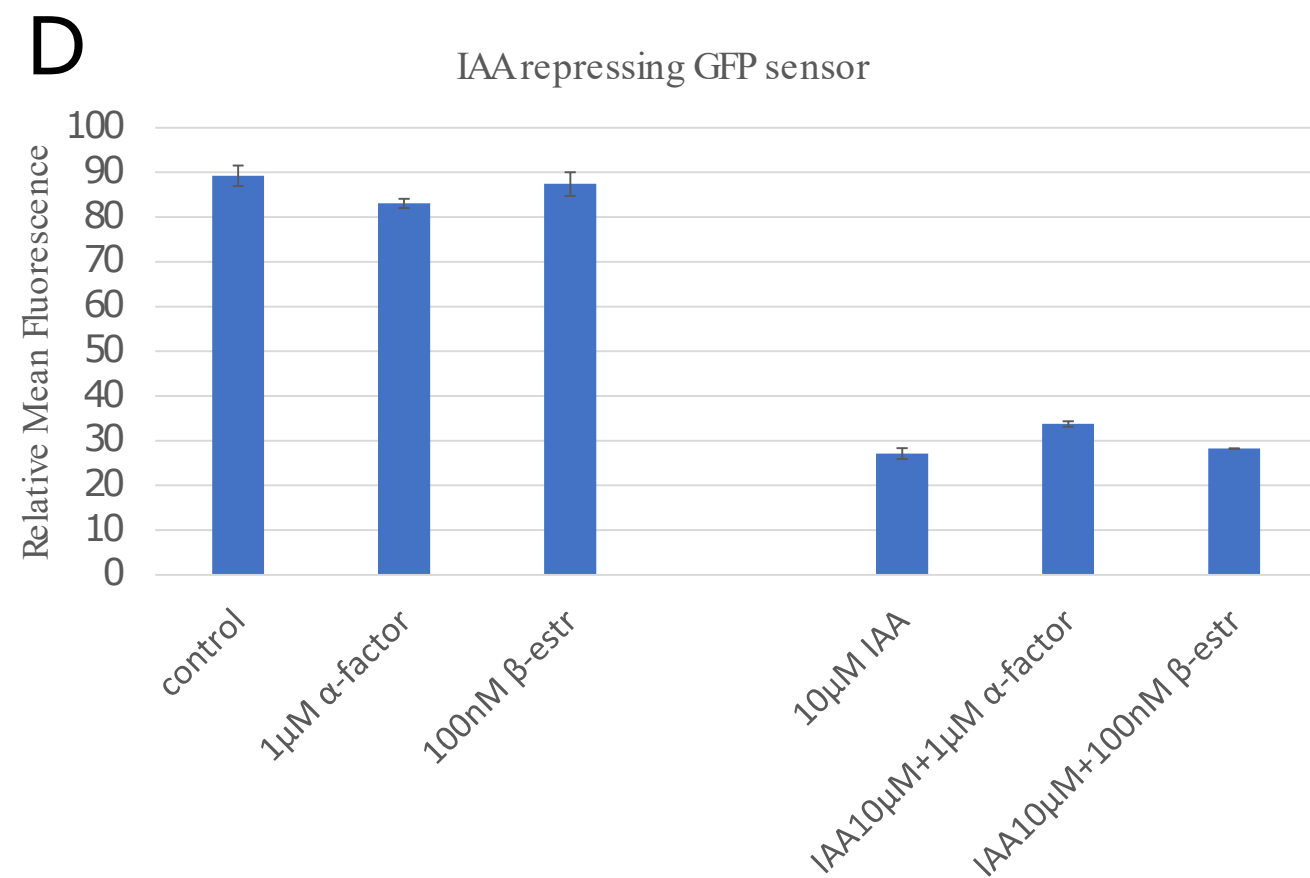

Supplement: supp [file elife_poa_e74540_Figure_1_figure_supplement_7.pdf › elife_poa_e74540_Figure_1_figure_supplement_7.pdf]

**A**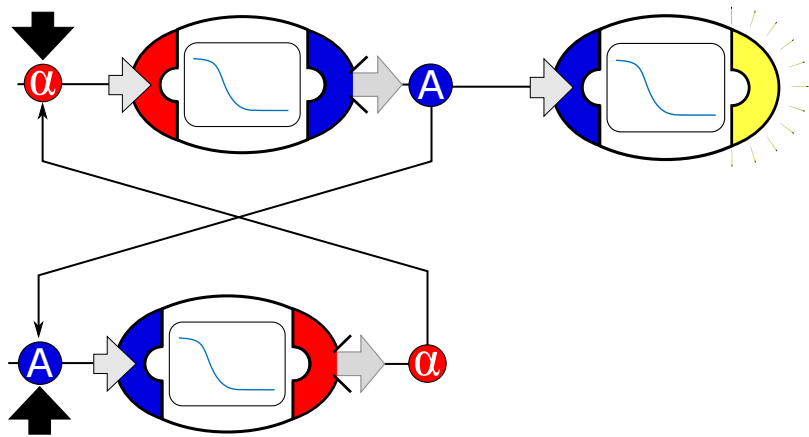**B**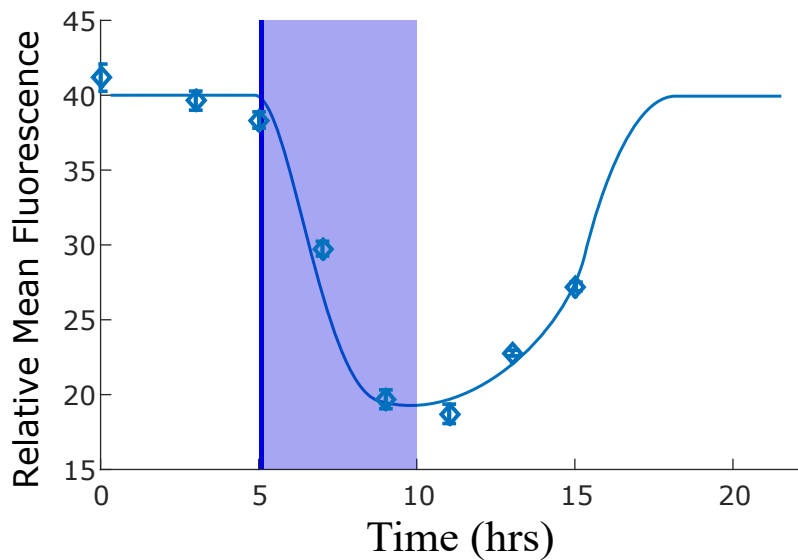

Supplement: supp [file elife_poa_e74540_Figure_3_figure_supplement_1.pdf › elife_poa_e74540_Figure_3_figure_supplement_1.pdf]

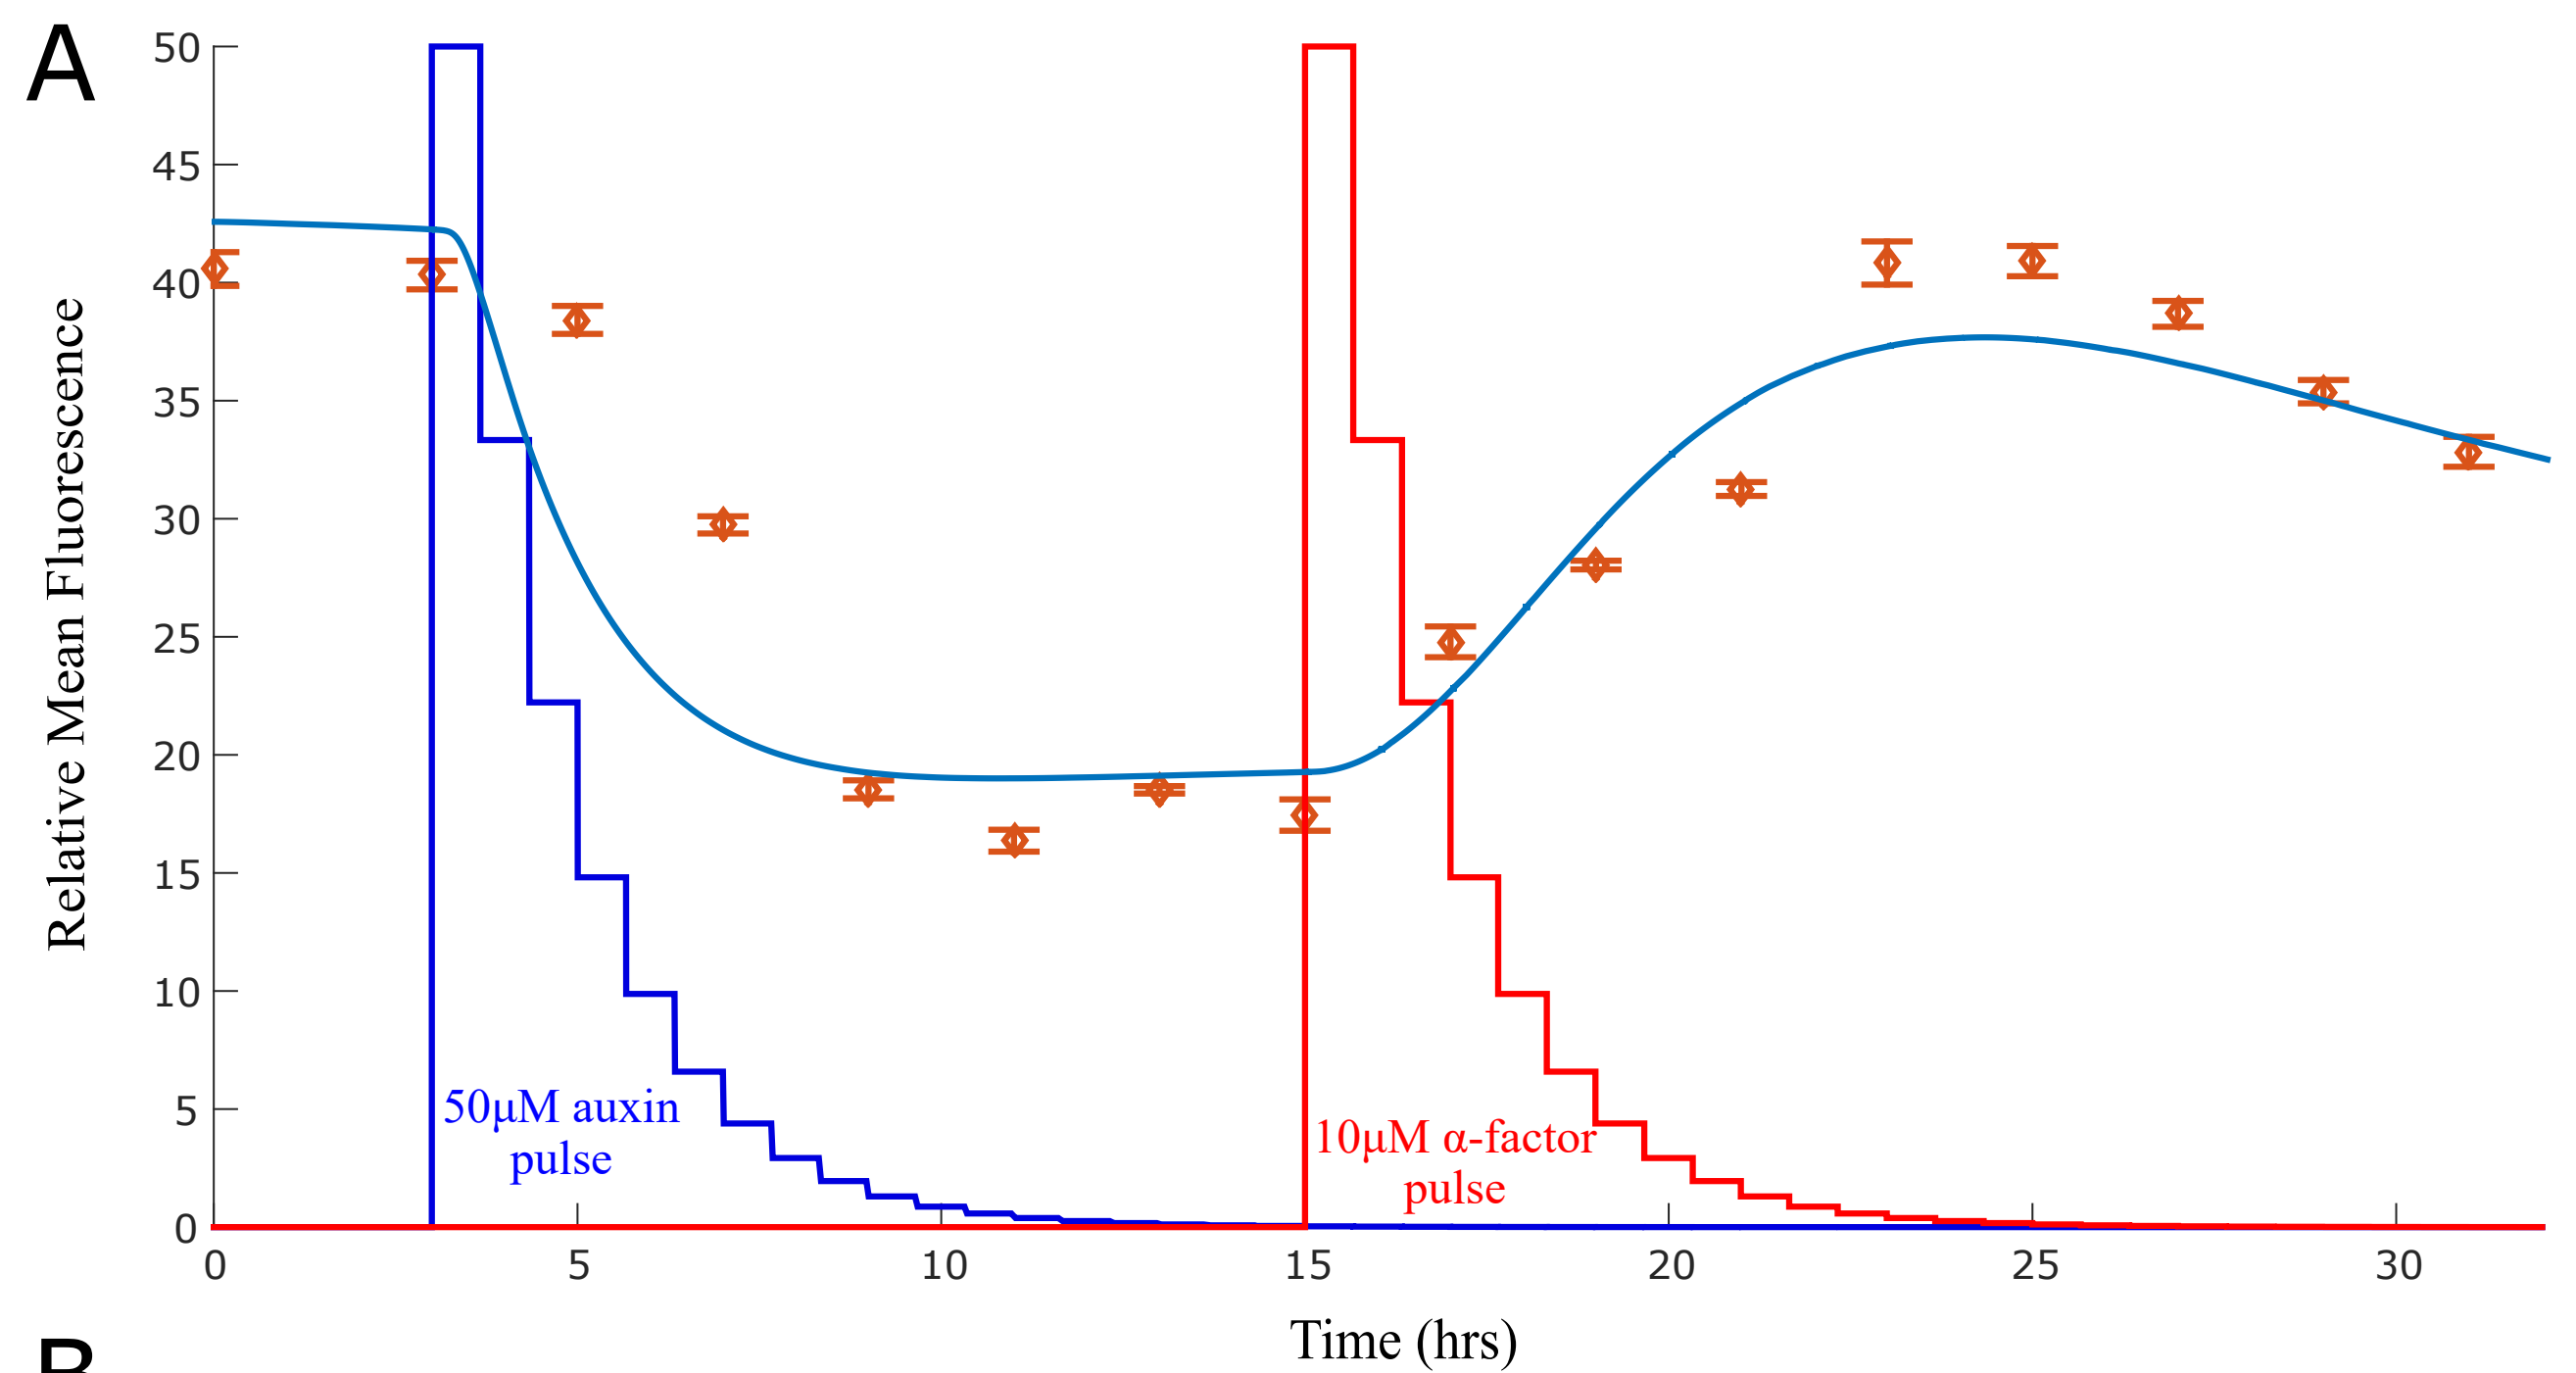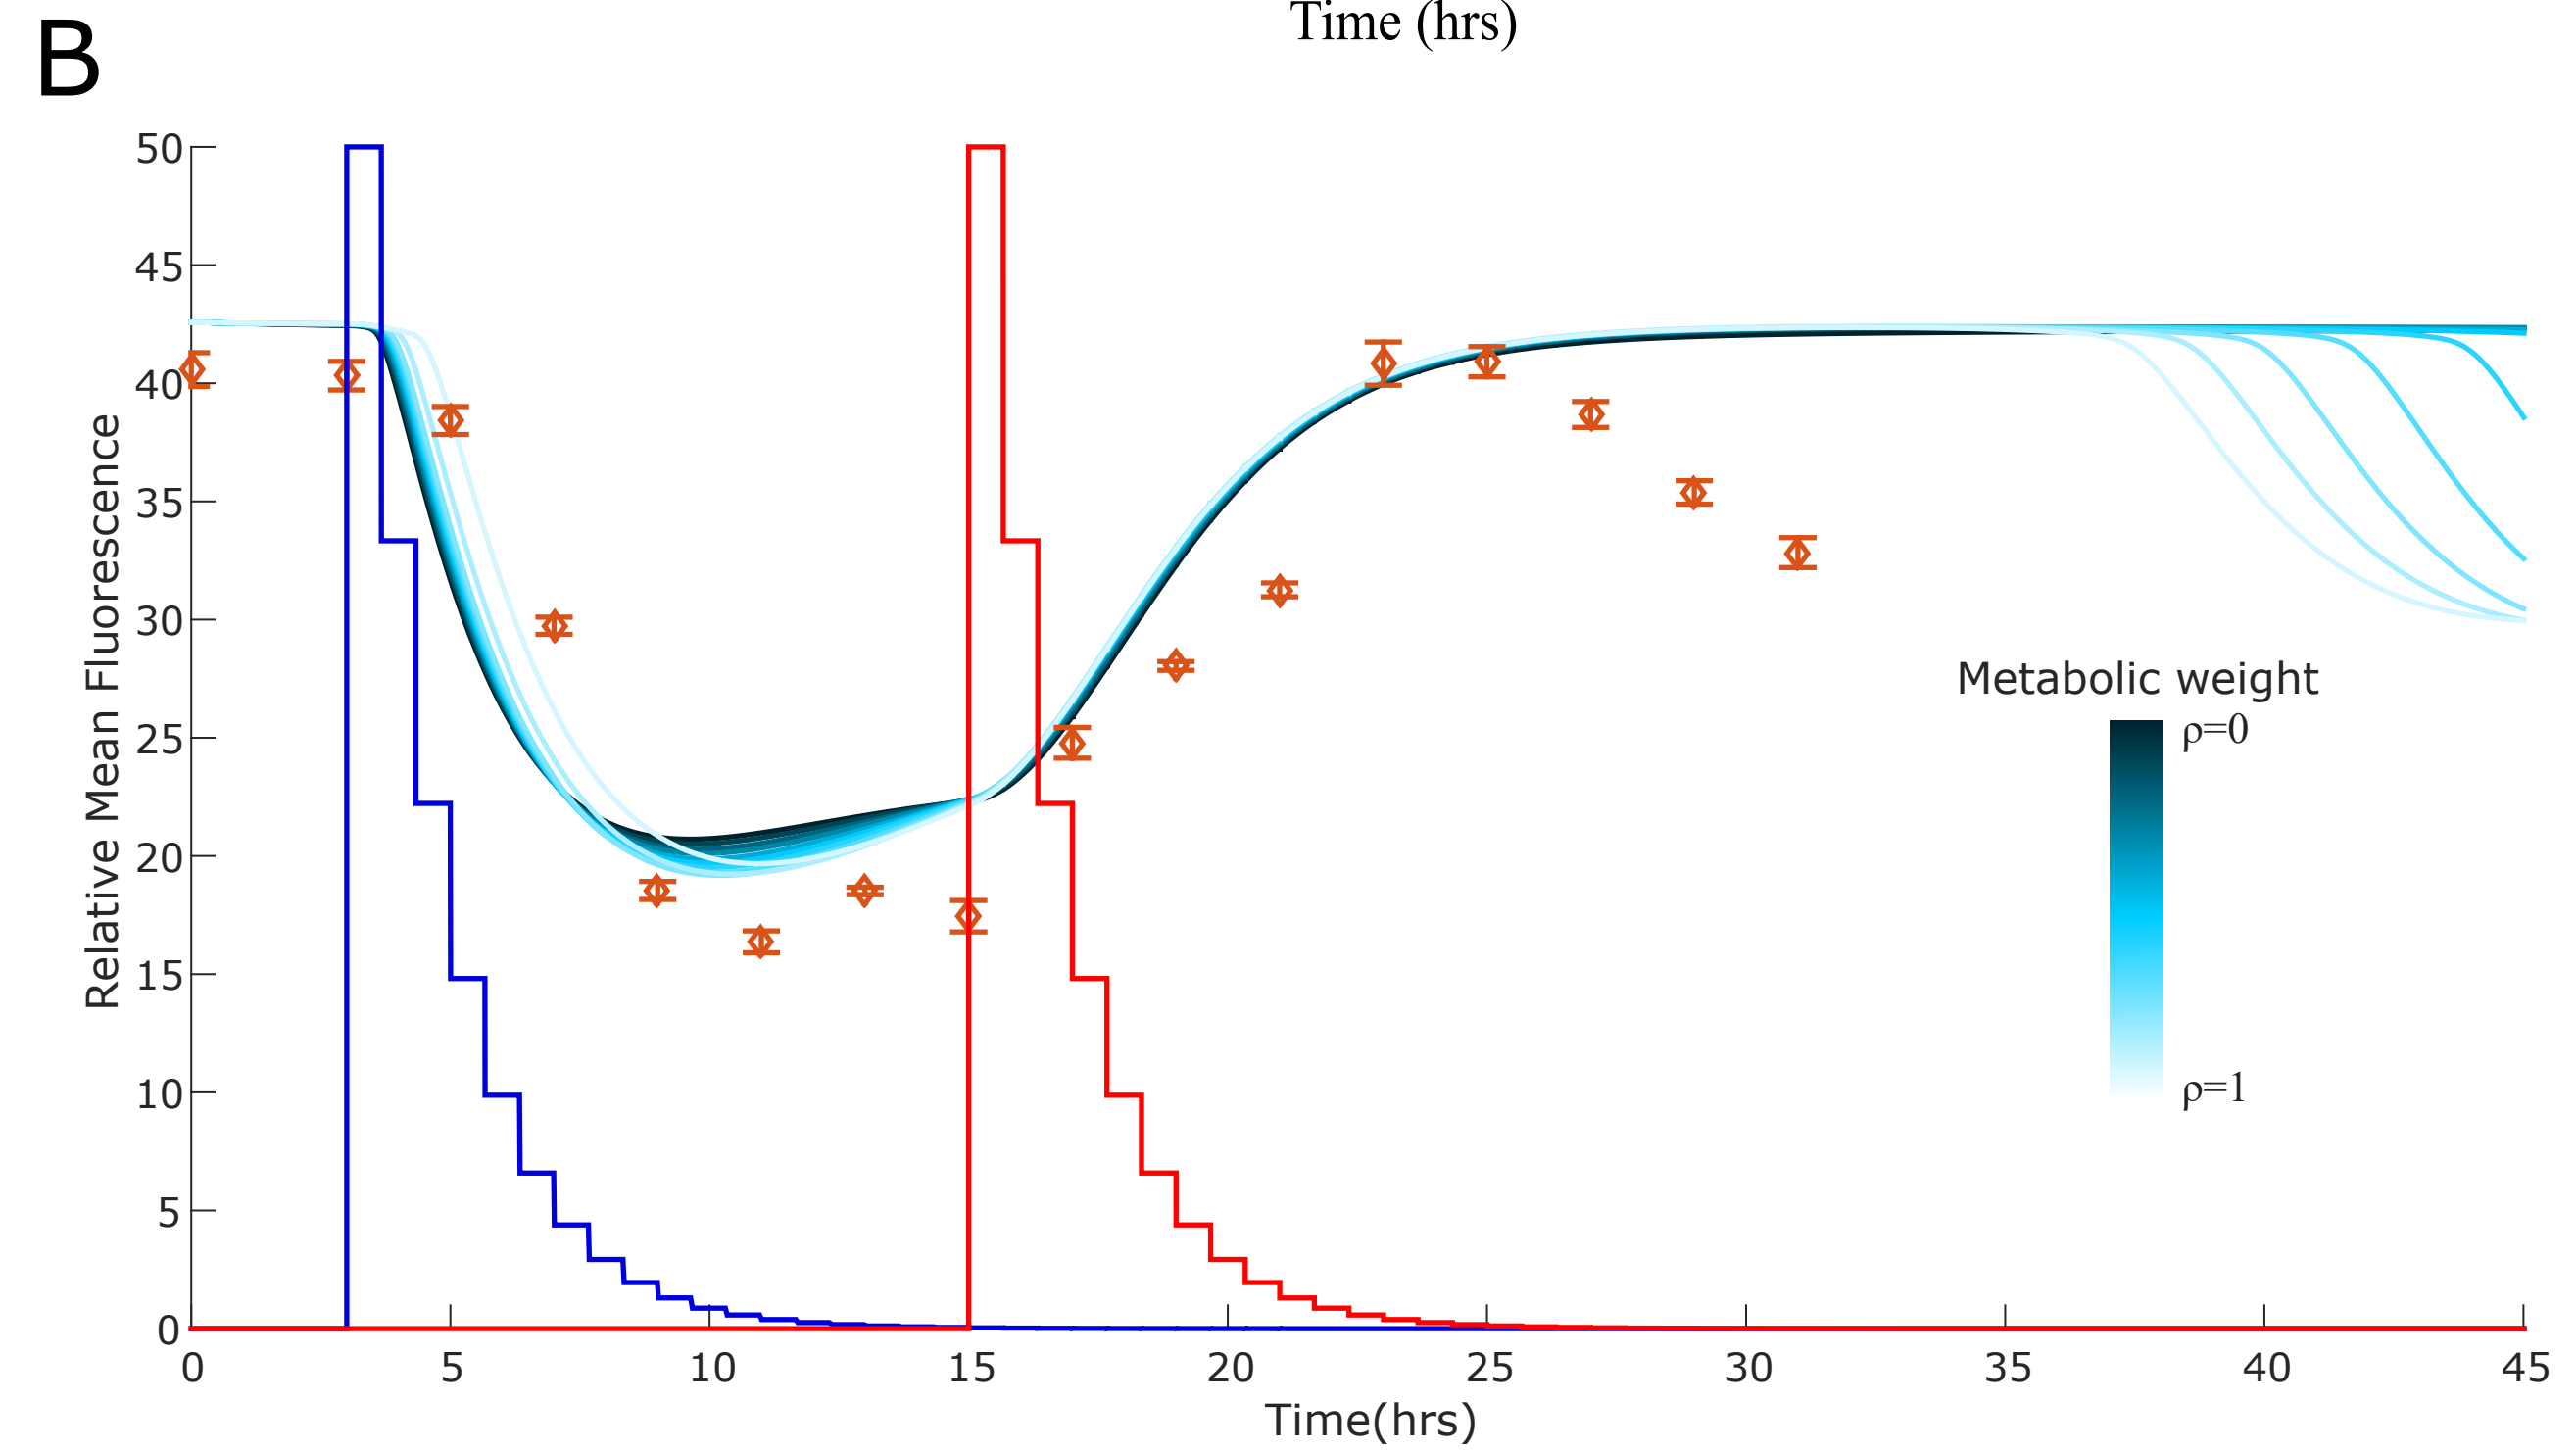

Supplement: supp [file elife_poa_e74540_Figure_3_figure_supplement_2.pdf › elife_poa_e74540_Figure_3_figure_supplement_2.pdf]

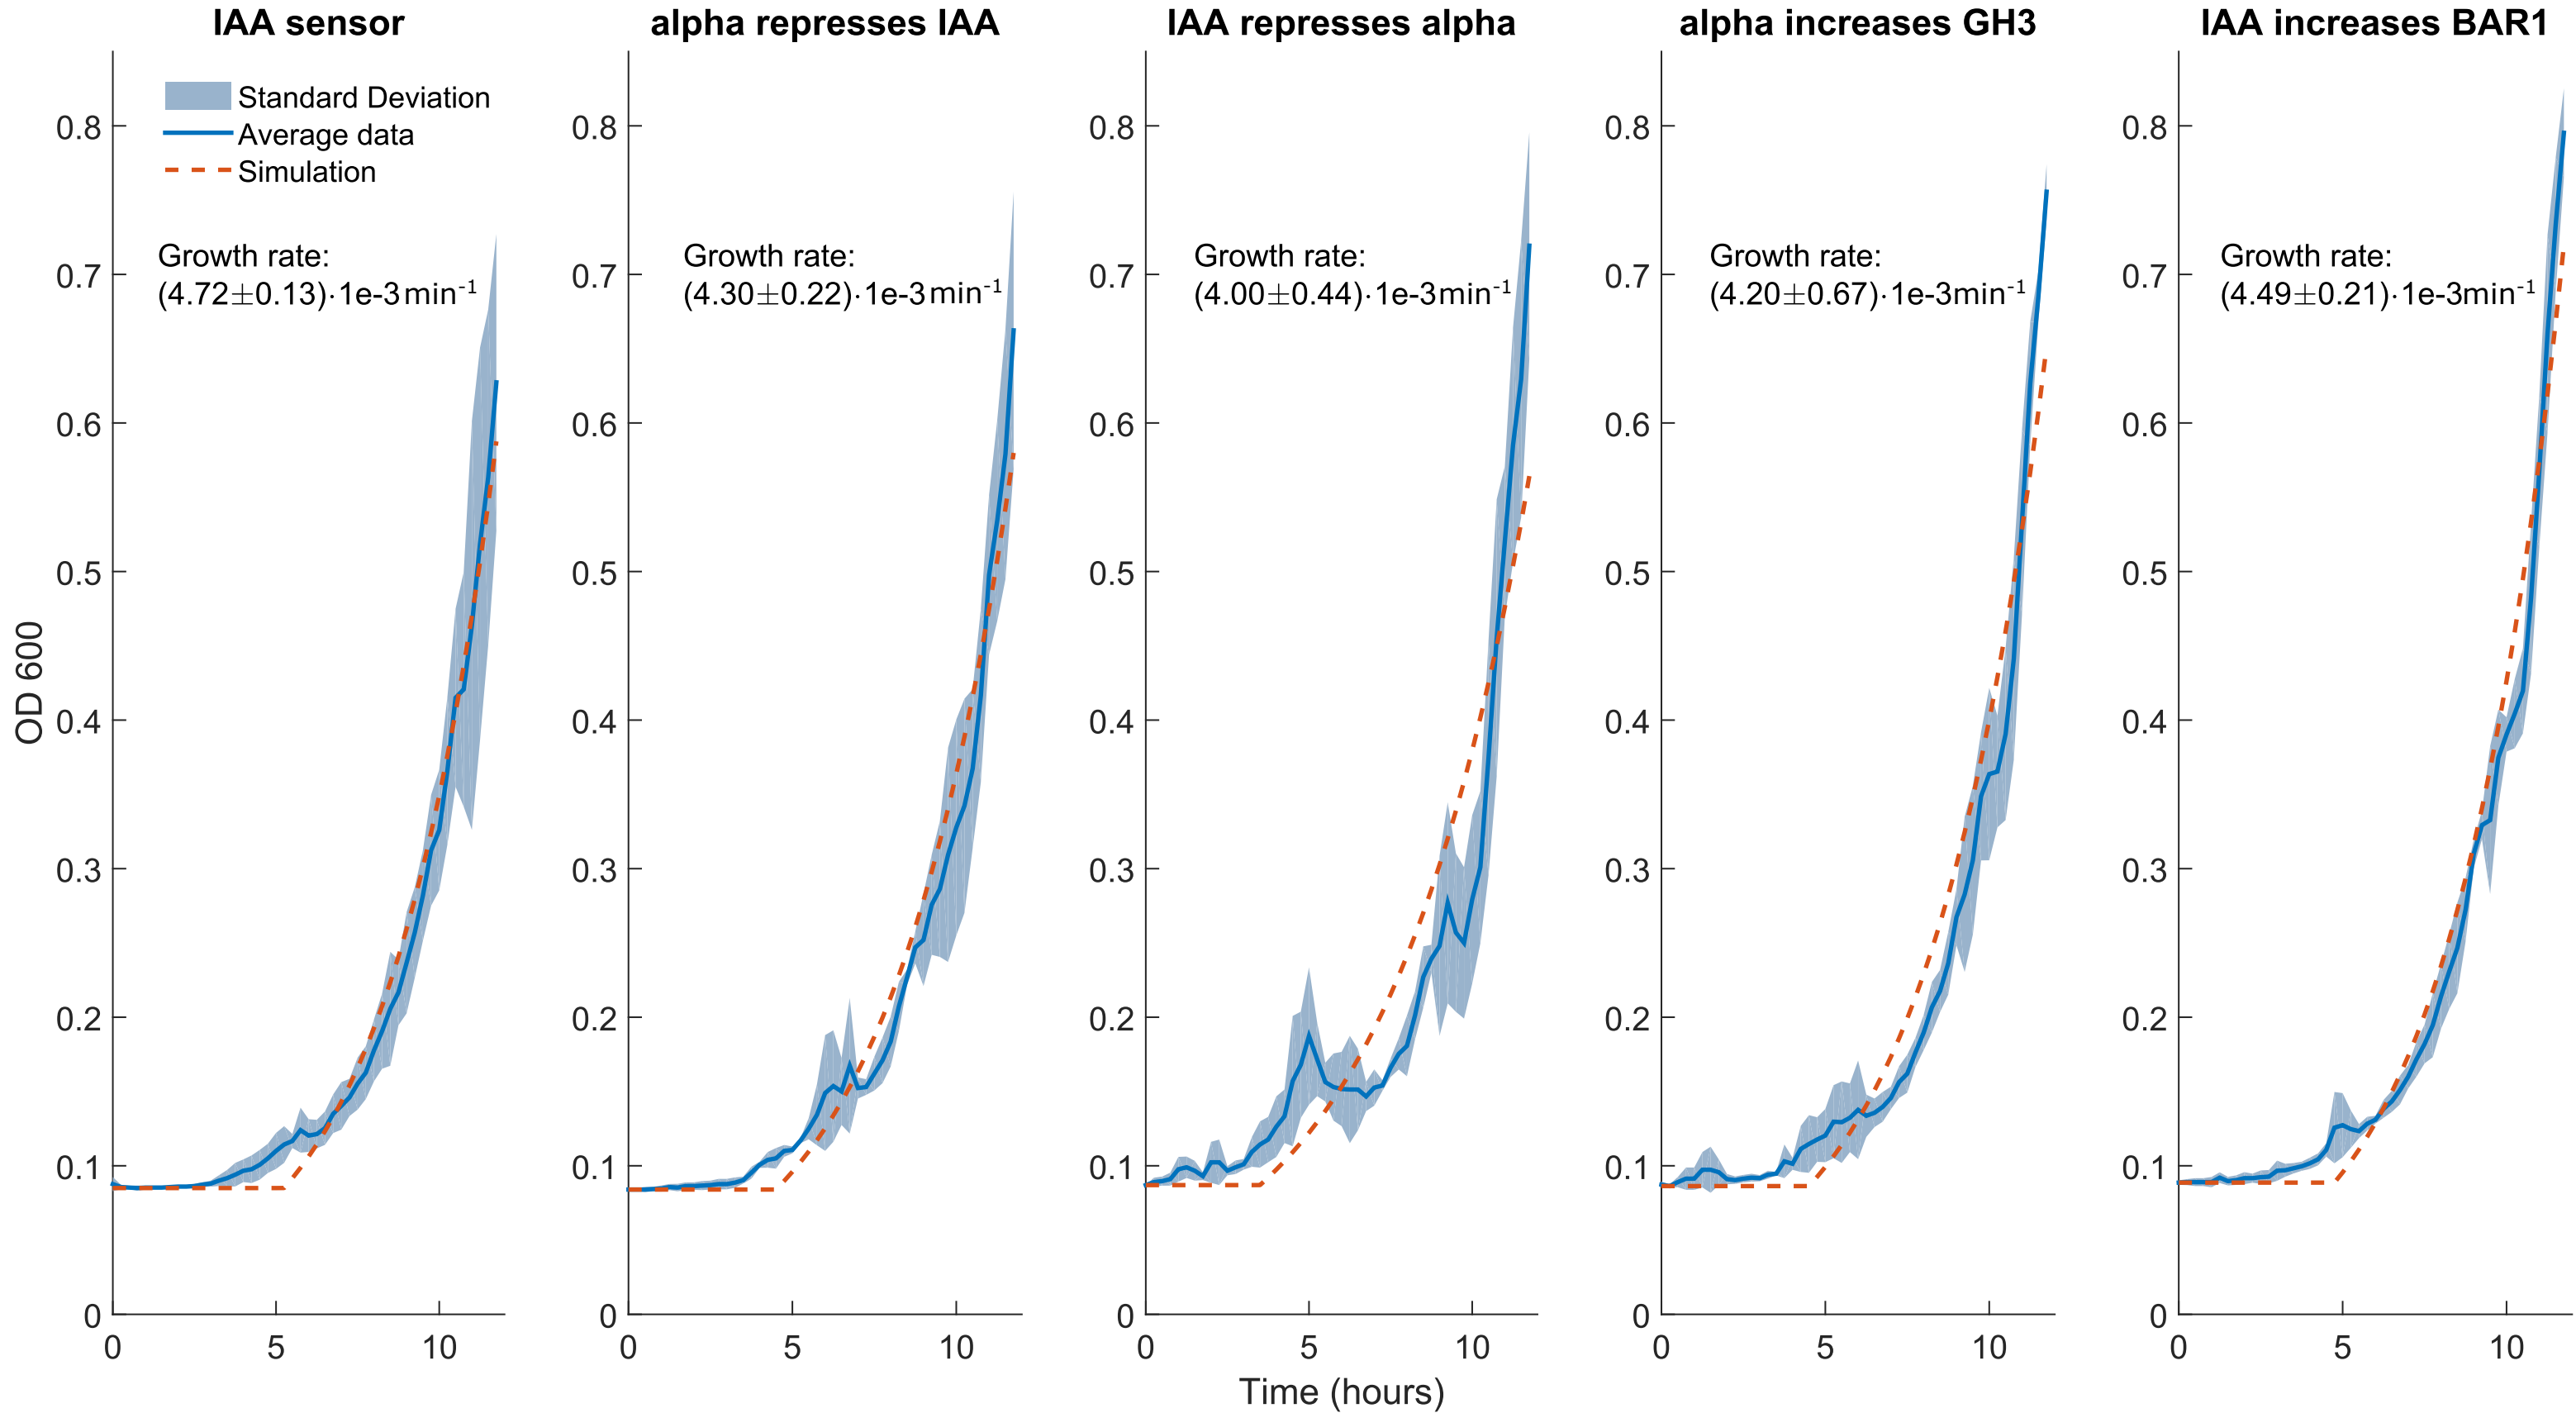

**ANOVA Table**

| Source  | SS          | df | MS          | F    | Prob>F |
|---------|-------------|----|-------------|------|--------|
| Columns | 8.92068e-07 | 4  | 2.23017e-07 | 1.49 | 0.2762 |
| Error   | 1.49435e-06 | 10 | 1.49435e-07 |      |        |
| Total   | 2.38642e-06 | 14 |             |      |        |

Supplement: supp [file elife_poa_e74540_Figure_3_figure_supplement_3.pdf › elife_poa_e74540_Figure_3_figure_supplement_3.pdf]

# AND gates

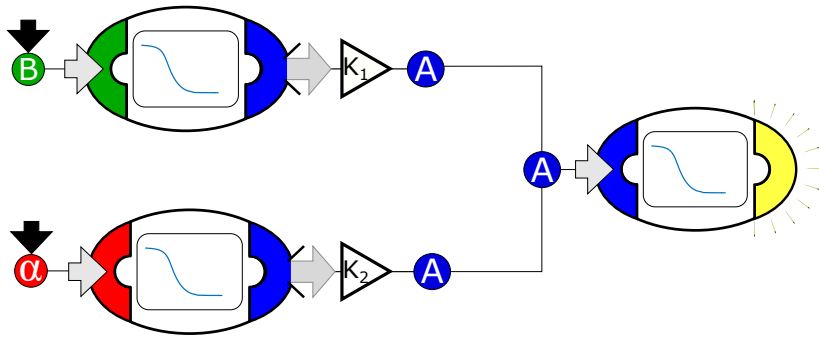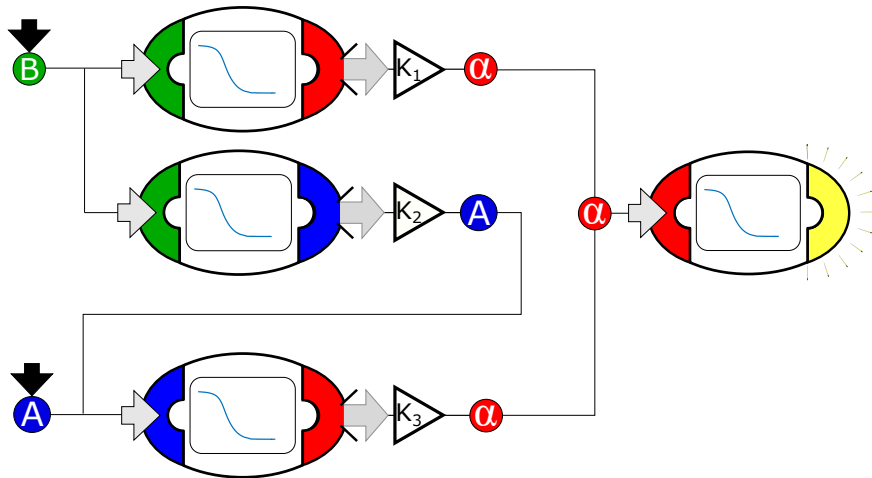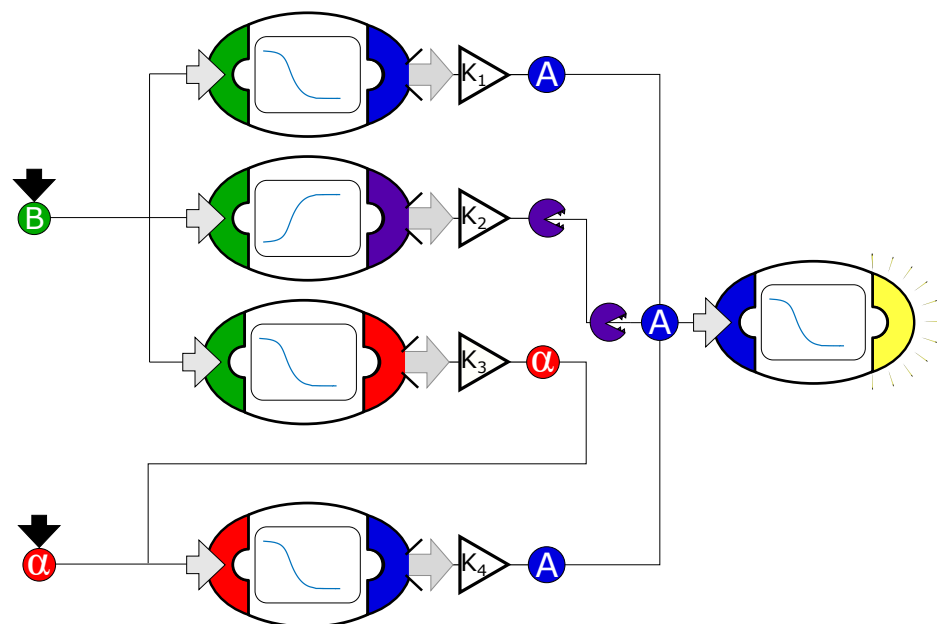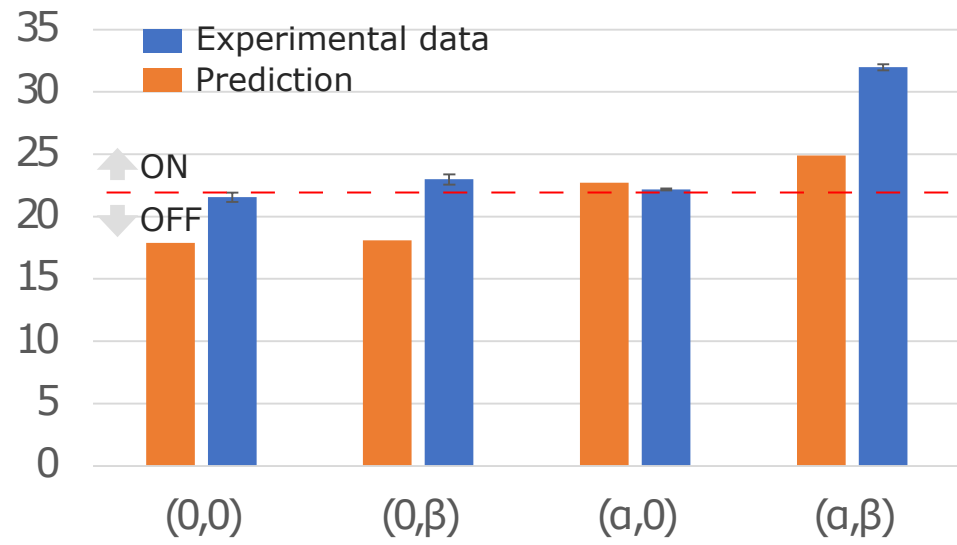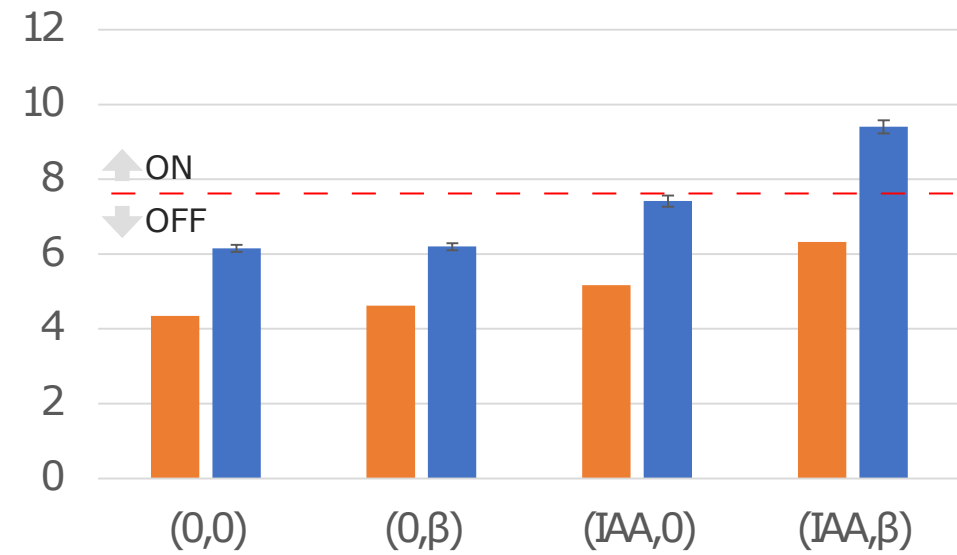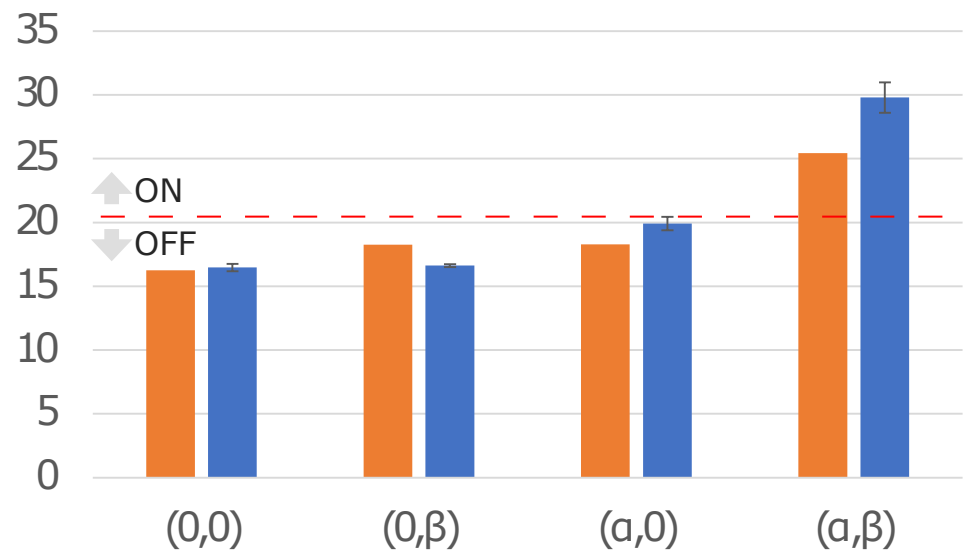

Supplement: supp [file elife_poa_e74540_Figure_4_figure_supplement_1.pdf › elife_poa_e74540_Figure_4_figure_supplement_1.pdf]

# OR gates

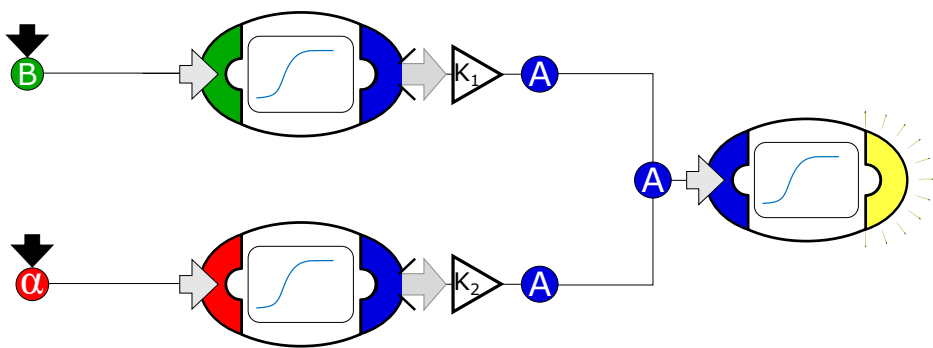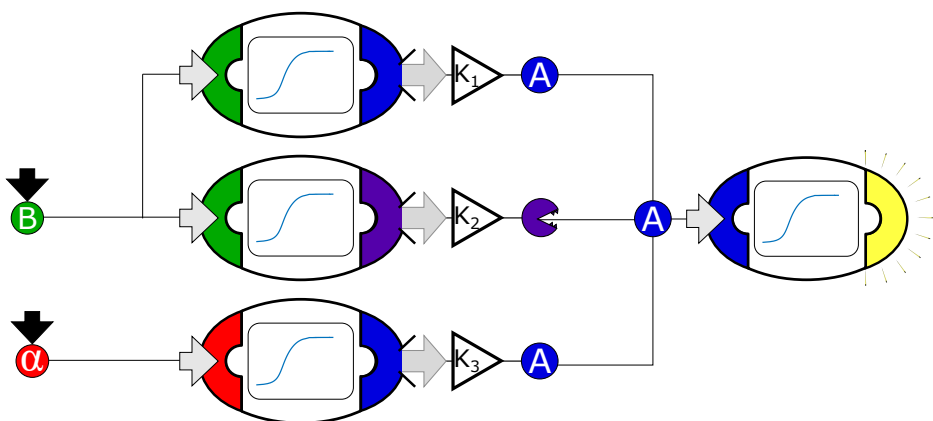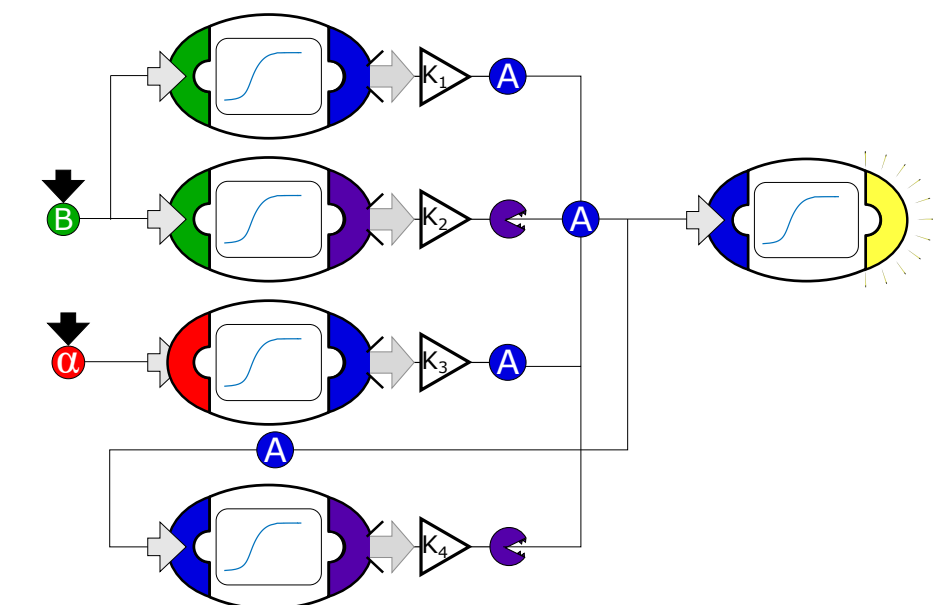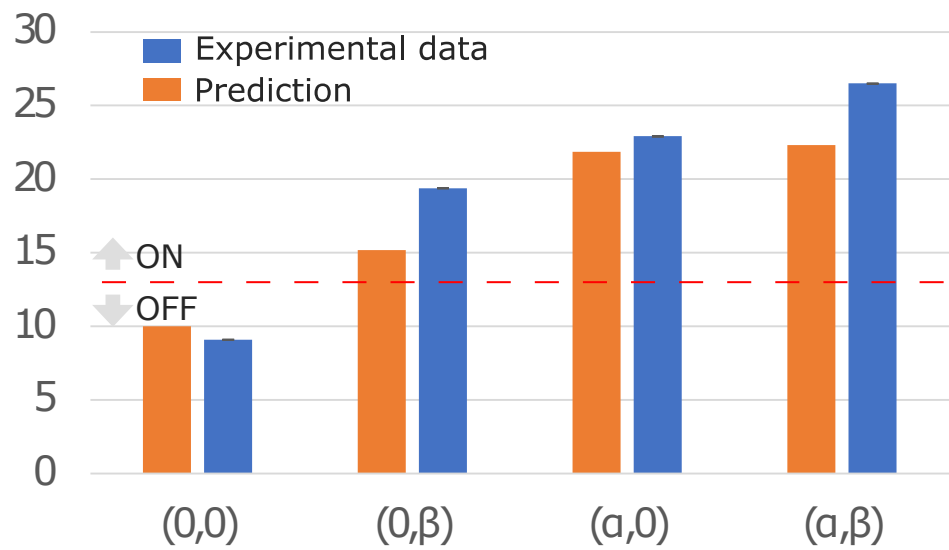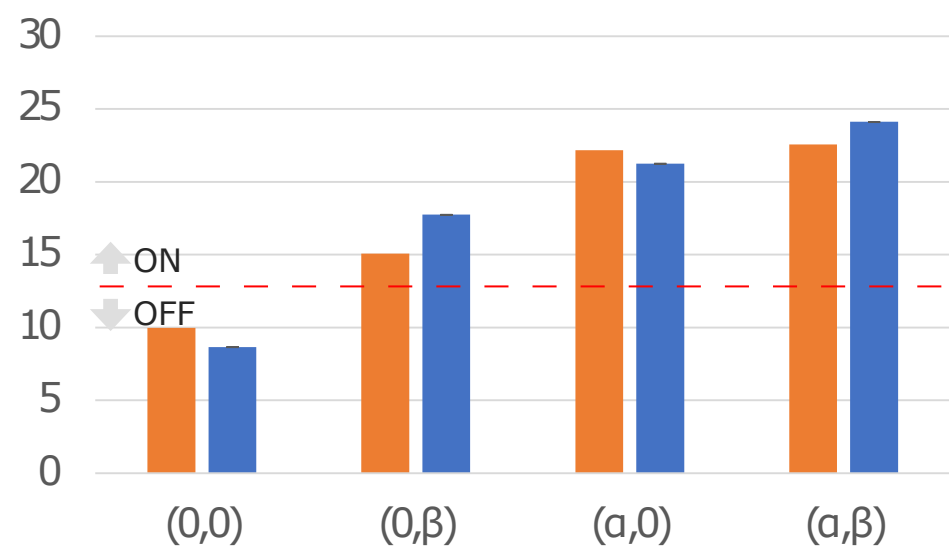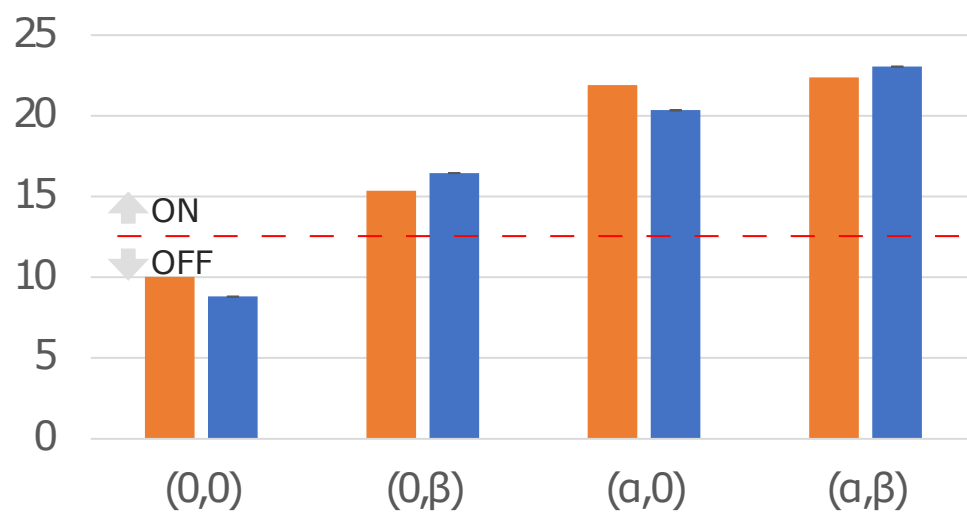

Supplement: supp [file elife_poa_e74540_Figure_4_figure_supplement_2.pdf › elife_poa_e74540_Figure_4_figure_supplement_2.pdf]

# NAND gates

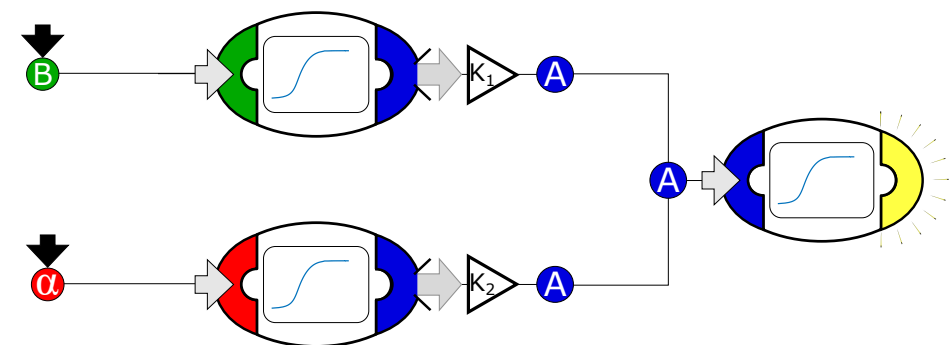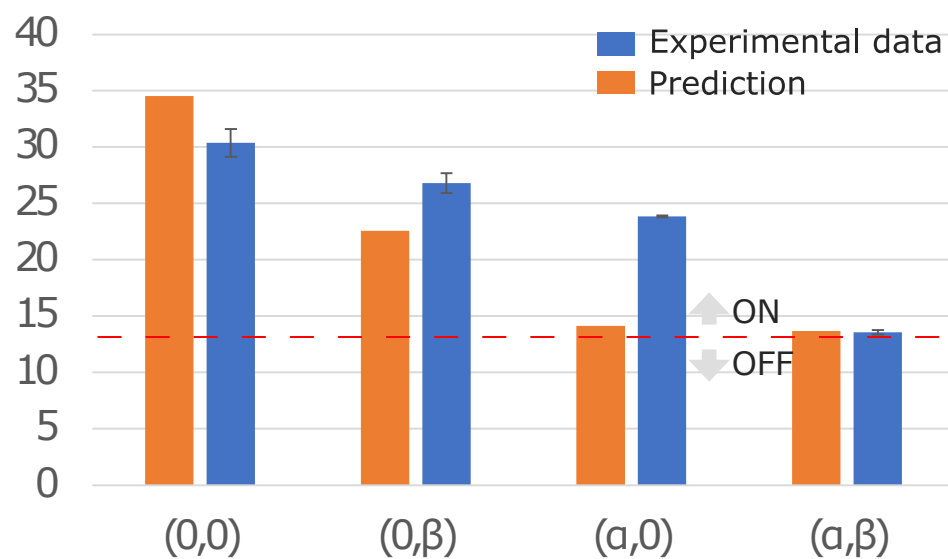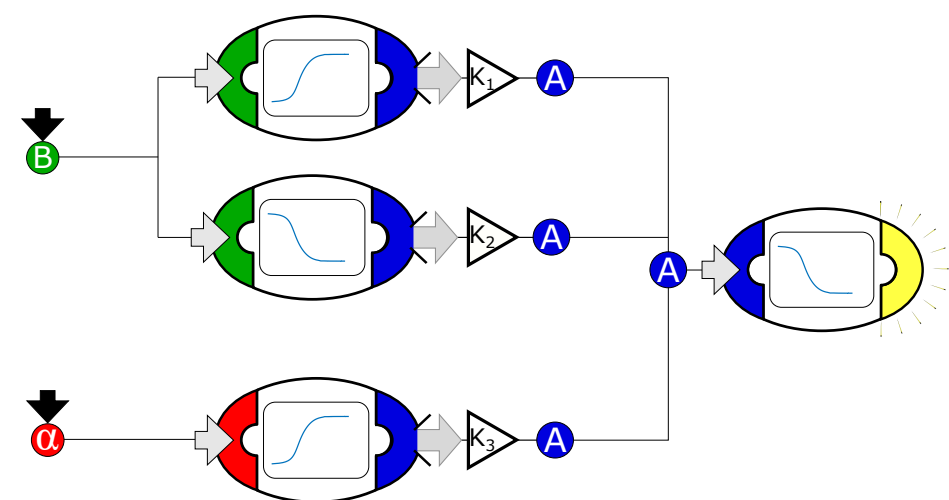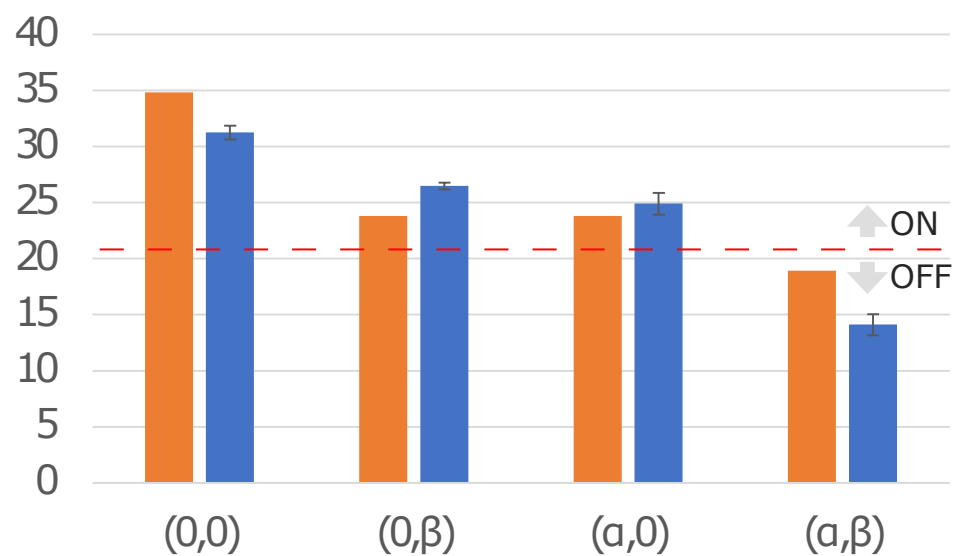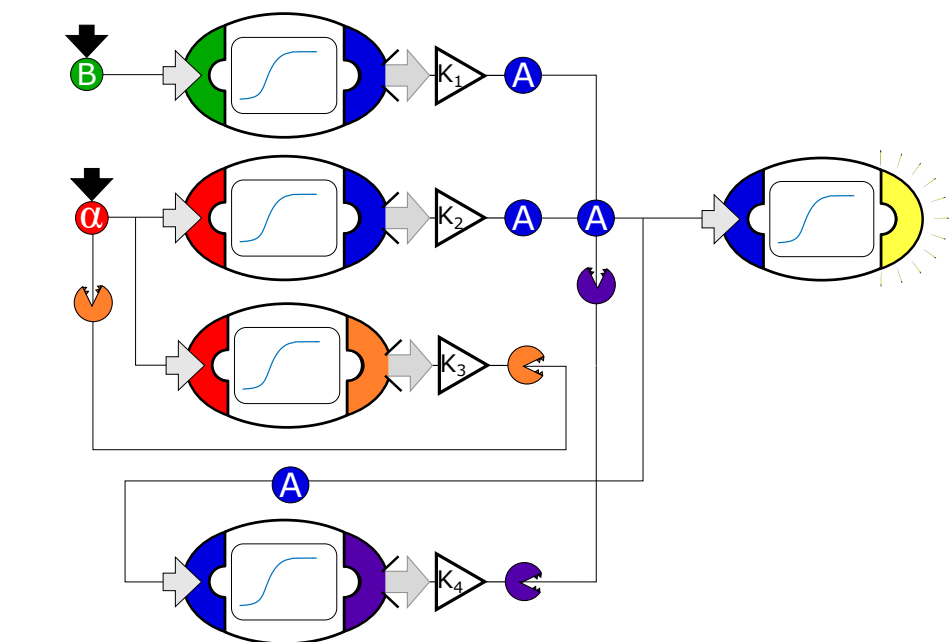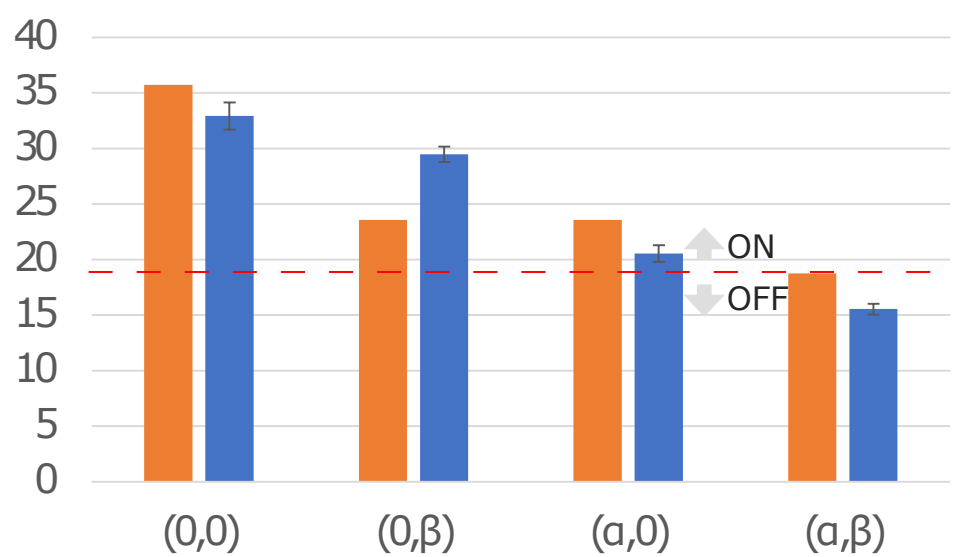

Supplement: supp [file elife_poa_e74540_Figure_4_figure_supplement_3.pdf › elife_poa_e74540_Figure_4_figure_supplement_3.pdf]

# NOR gates

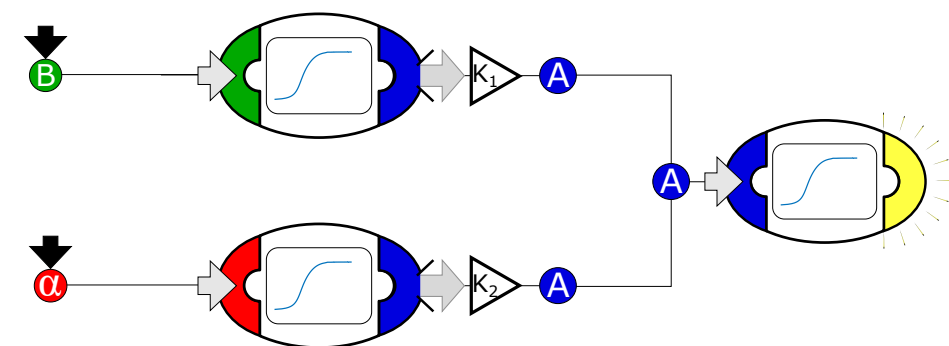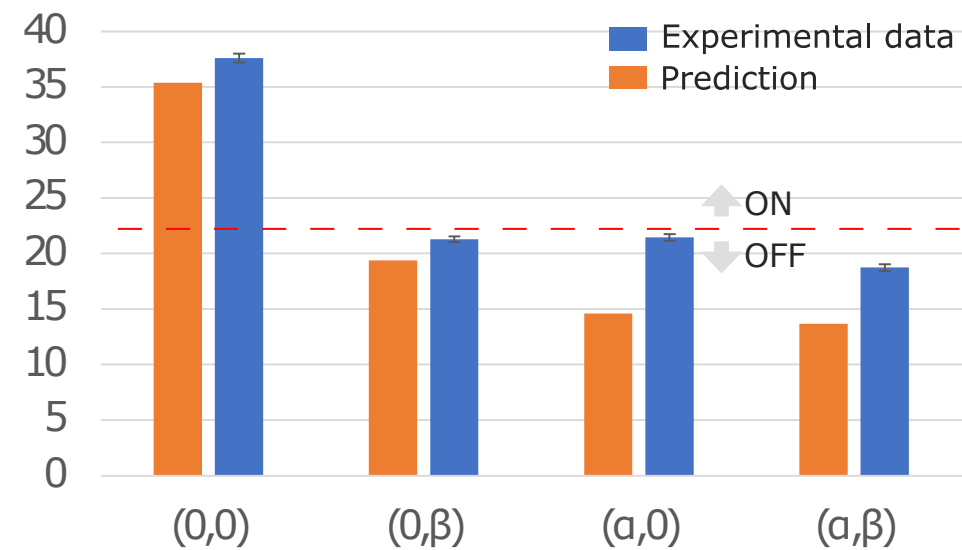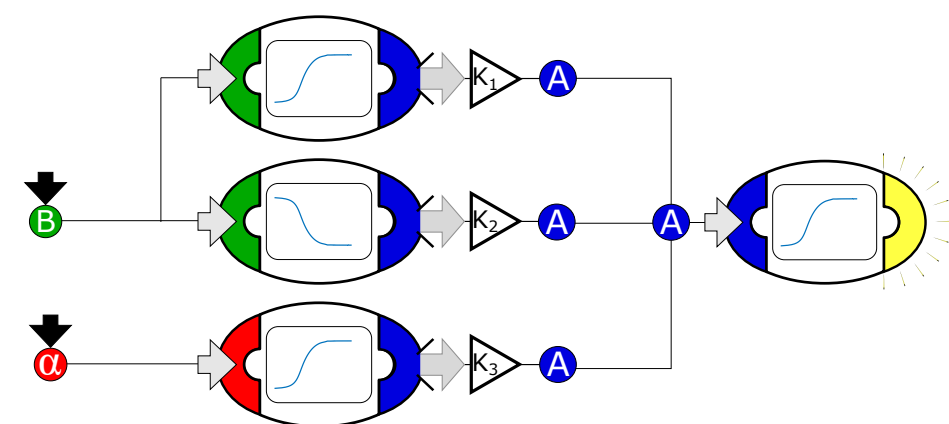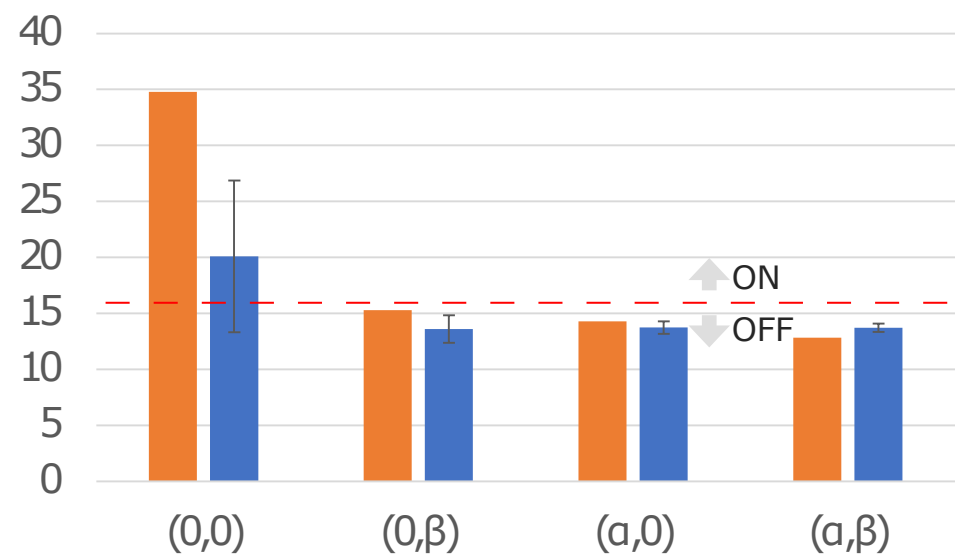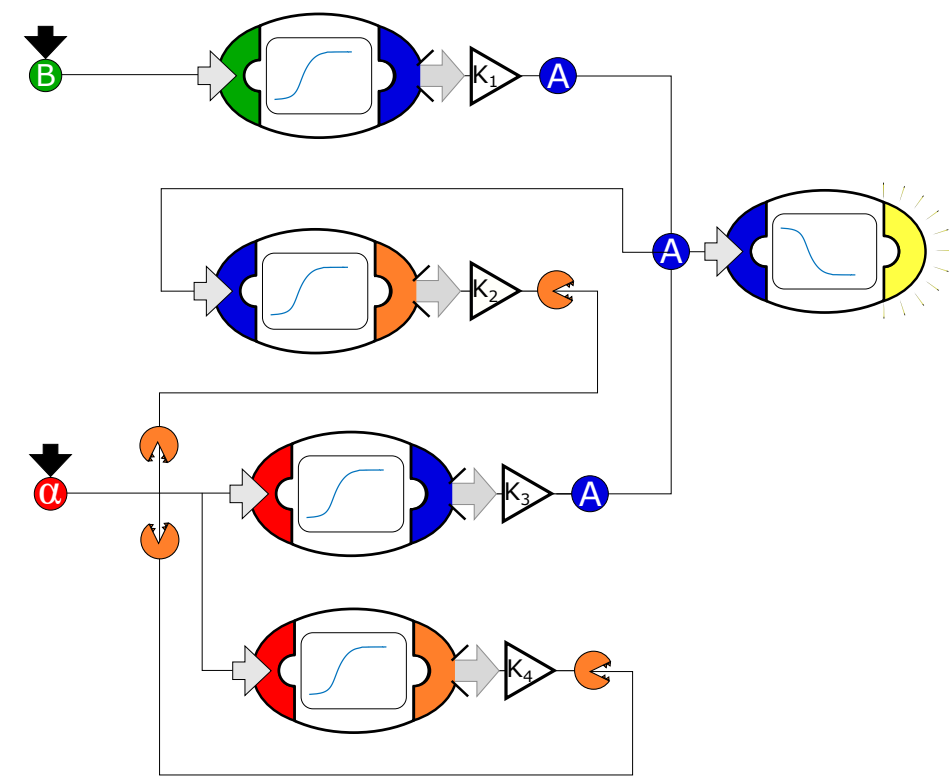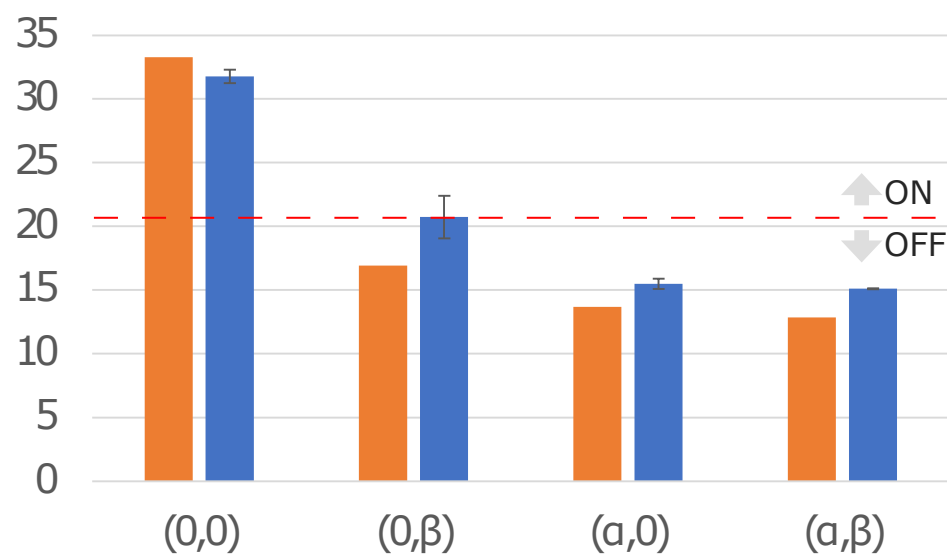

Supplement: supp [file elife_poa_e74540_Figure_4_figure_supplement_4.pdf › elife_poa_e74540_Figure_4_figure_supplement_4.pdf]
